# Supplementary material for: Trypanosoma cruzi Isolates Naturally Adapted to Congenital Transmission Display a Unique Strategy of Transplacental Passage
Source: PubMed Central journal article supplement (PMC10100920; doi:10.1128/spectrum.02504-22), 2023-02-14

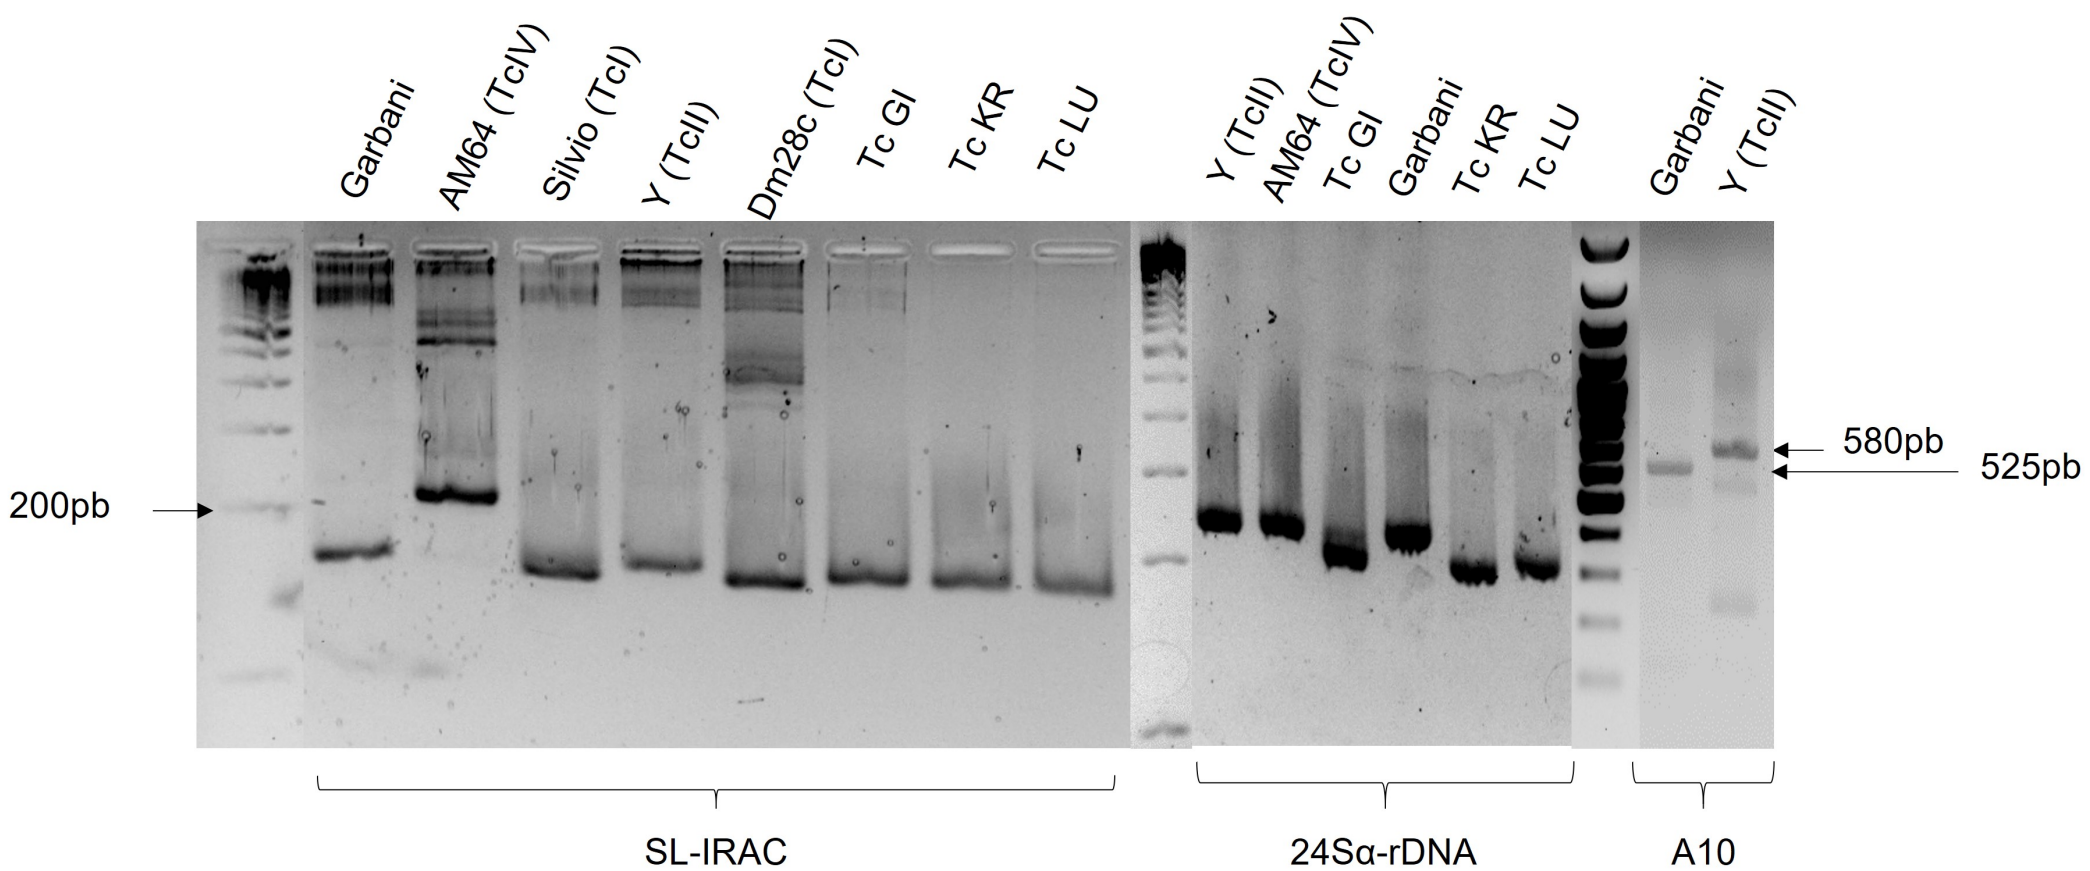

PCR fragment size obtained for the different strains

| Strain            | SL-IRAC | 24Sα-rDNA | A10 | DTU  |
|-------------------|---------|-----------|-----|------|
| Dm28c (Reference) | 150     | -         | -   | TcI  |
| Y (Reference)     | 157     | 140       | 580 | TcII |
| AM64 (Reference)  | 200     | 140       | -   | TcIV |
| Garbani           | 157     | 140       | 525 | TcVI |
| Tc GI             | 157     | 125       | -   | TcV  |
| Tc KR             | 157     | 125       | -   | TcV  |
| Tc LU             | 157     | 125       | -   | TcV  |

Figure S1. Molecular typification of the different *T. cruzi* strains by PCR method described by Cura et al., 2015

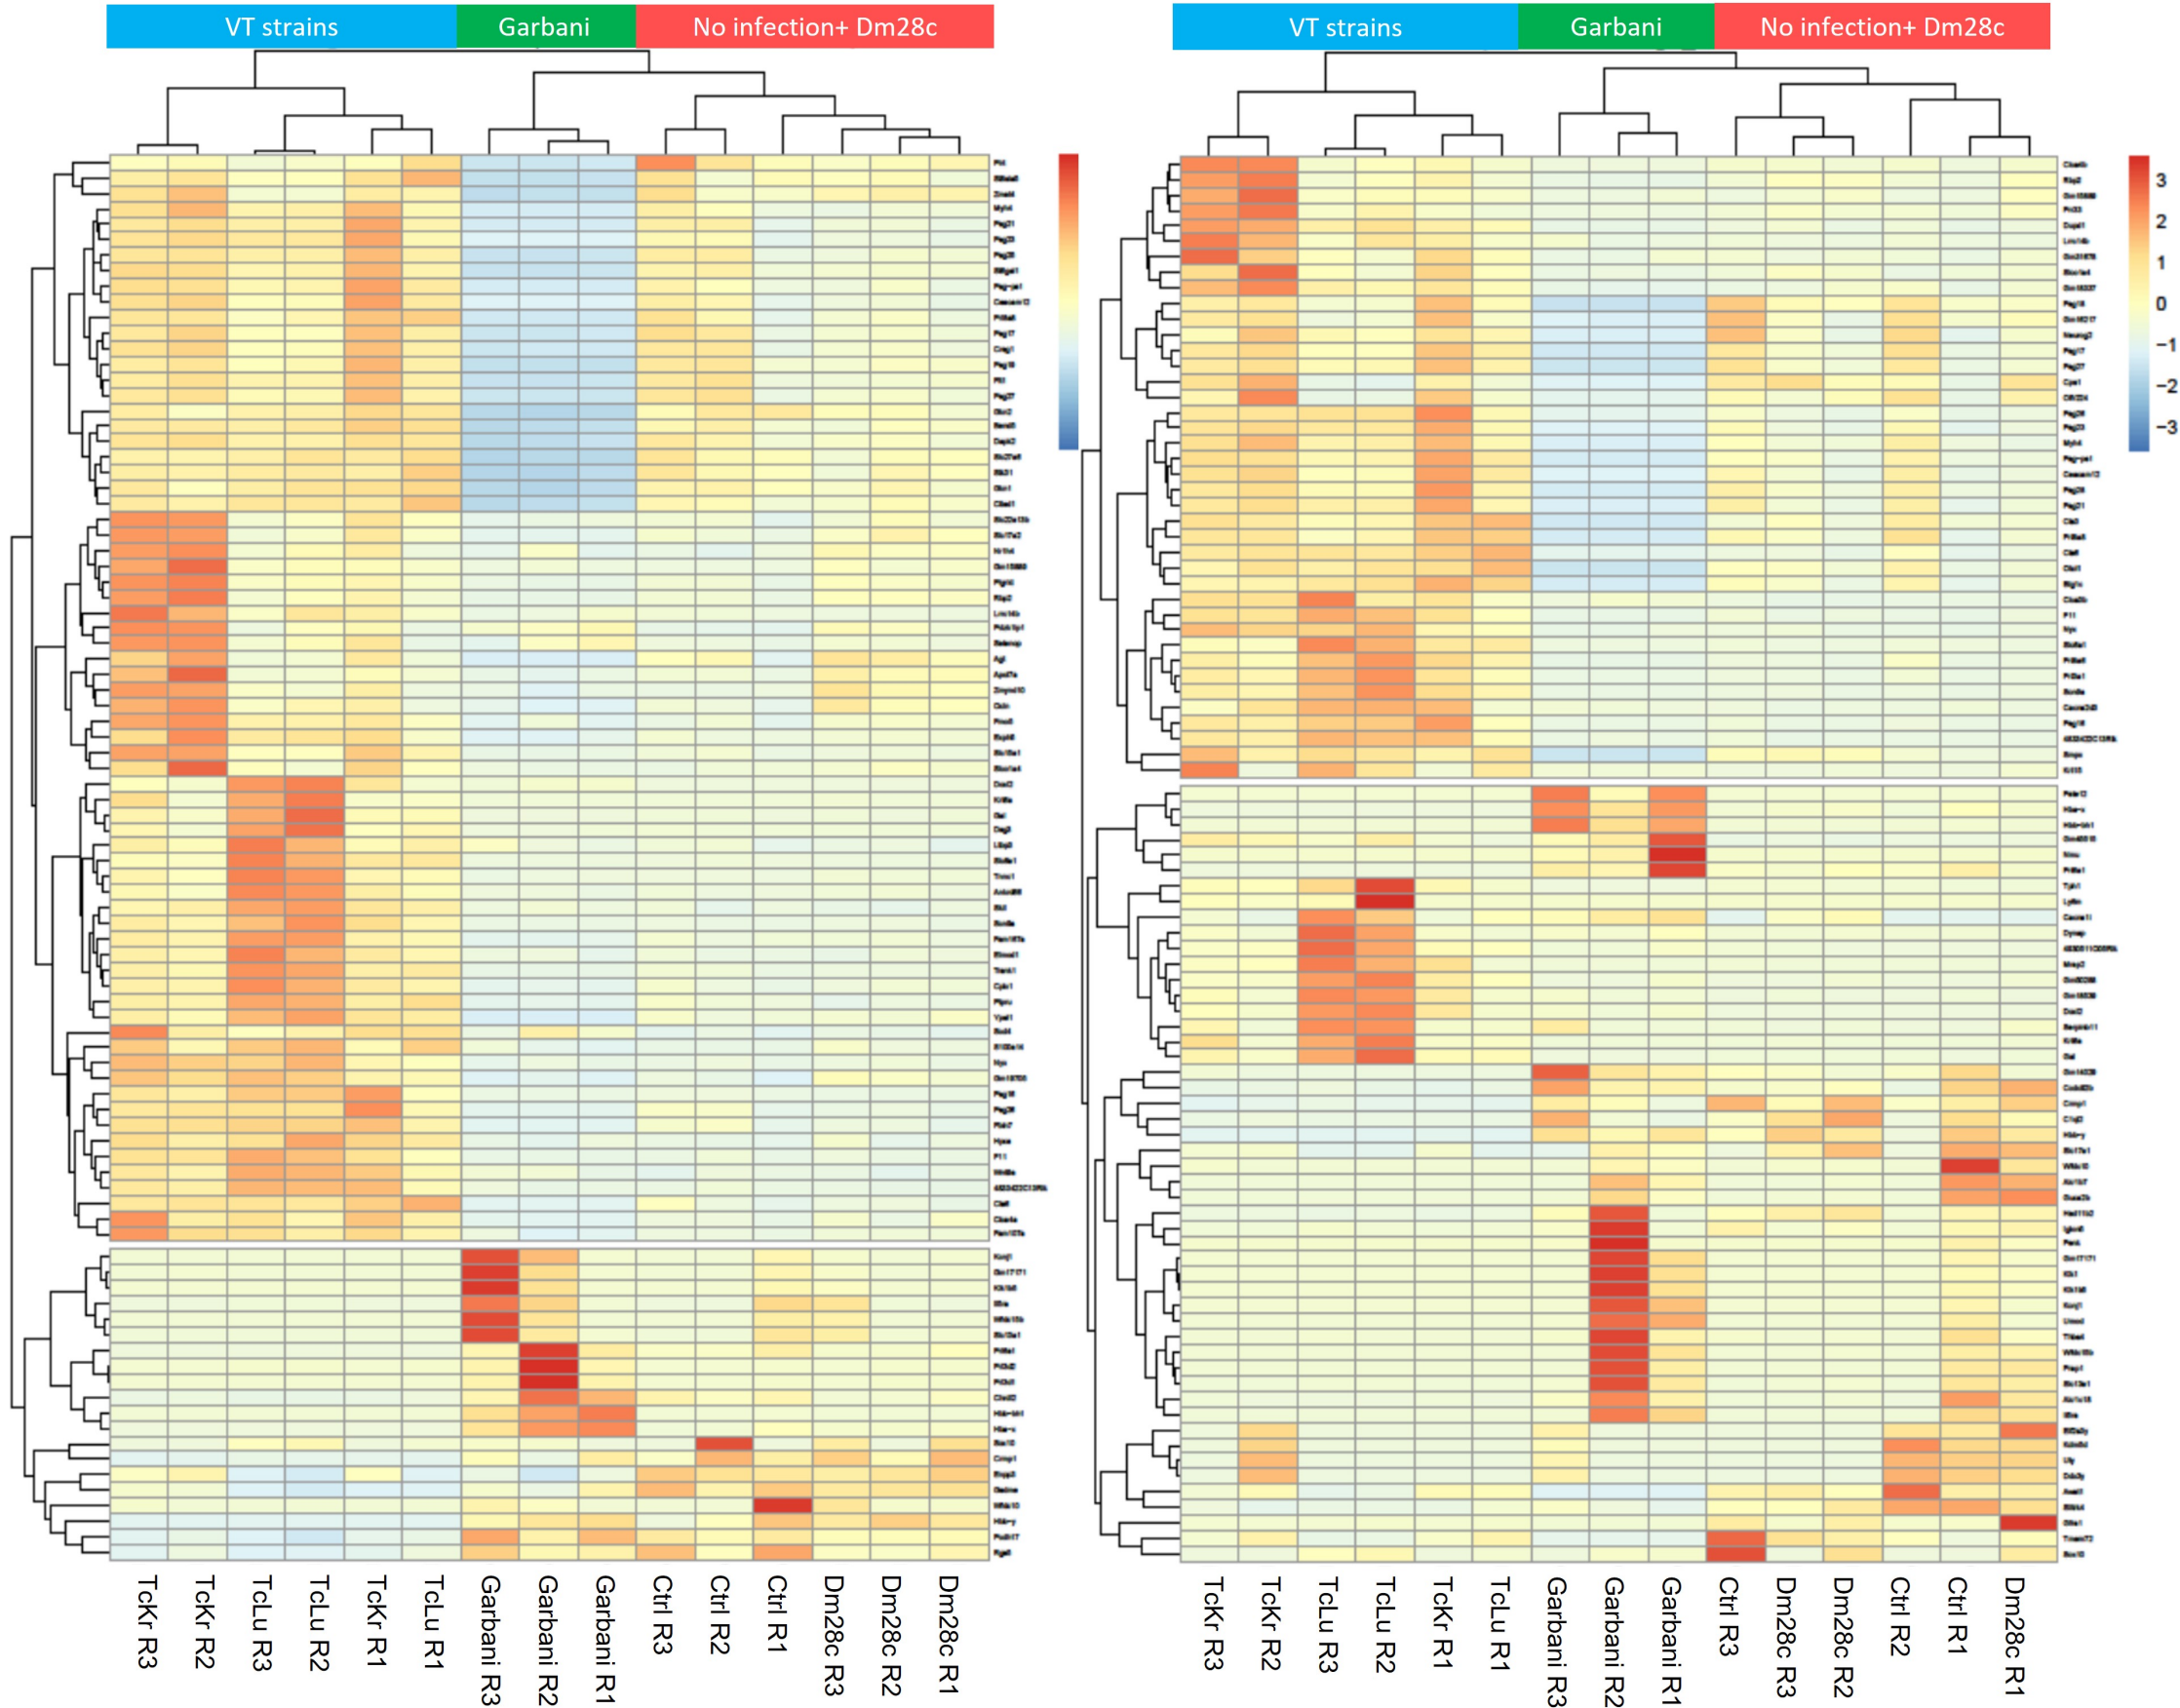

Figure S2. Cluster analysis showing normalized read counts for the top 30 more significant DEGs (left) and top 30 genes that change the most (right) in the different biological replicates within each experimental group.



## **Supplementary figure 4.**

**Heatmaps represent row scaled normalized mean (biological replicates) read count values for each strain infected placenta. Each heatmap shows the behavior of all genes from a selected pathway.**

- 1. Immune response (blue box indicates genes related to tolerance and anti-inflammatory processes, upregulated in VT strains)**
- 2. T-cell activation**
- 3. Inflammatory response**
- 4. Cell junctions**
- 5. Cell cycle and other related**
- 6. Mitotic cell cycle process**
- 7. Cell projections and morphogenesis**
- 8. Import to the cell**
- 9. Positive regulation of secretion and import**
- 10. Positive regulation of secretion**
- 11. Ribosomal cytoplasmatic proteins**



# T-Cell activation

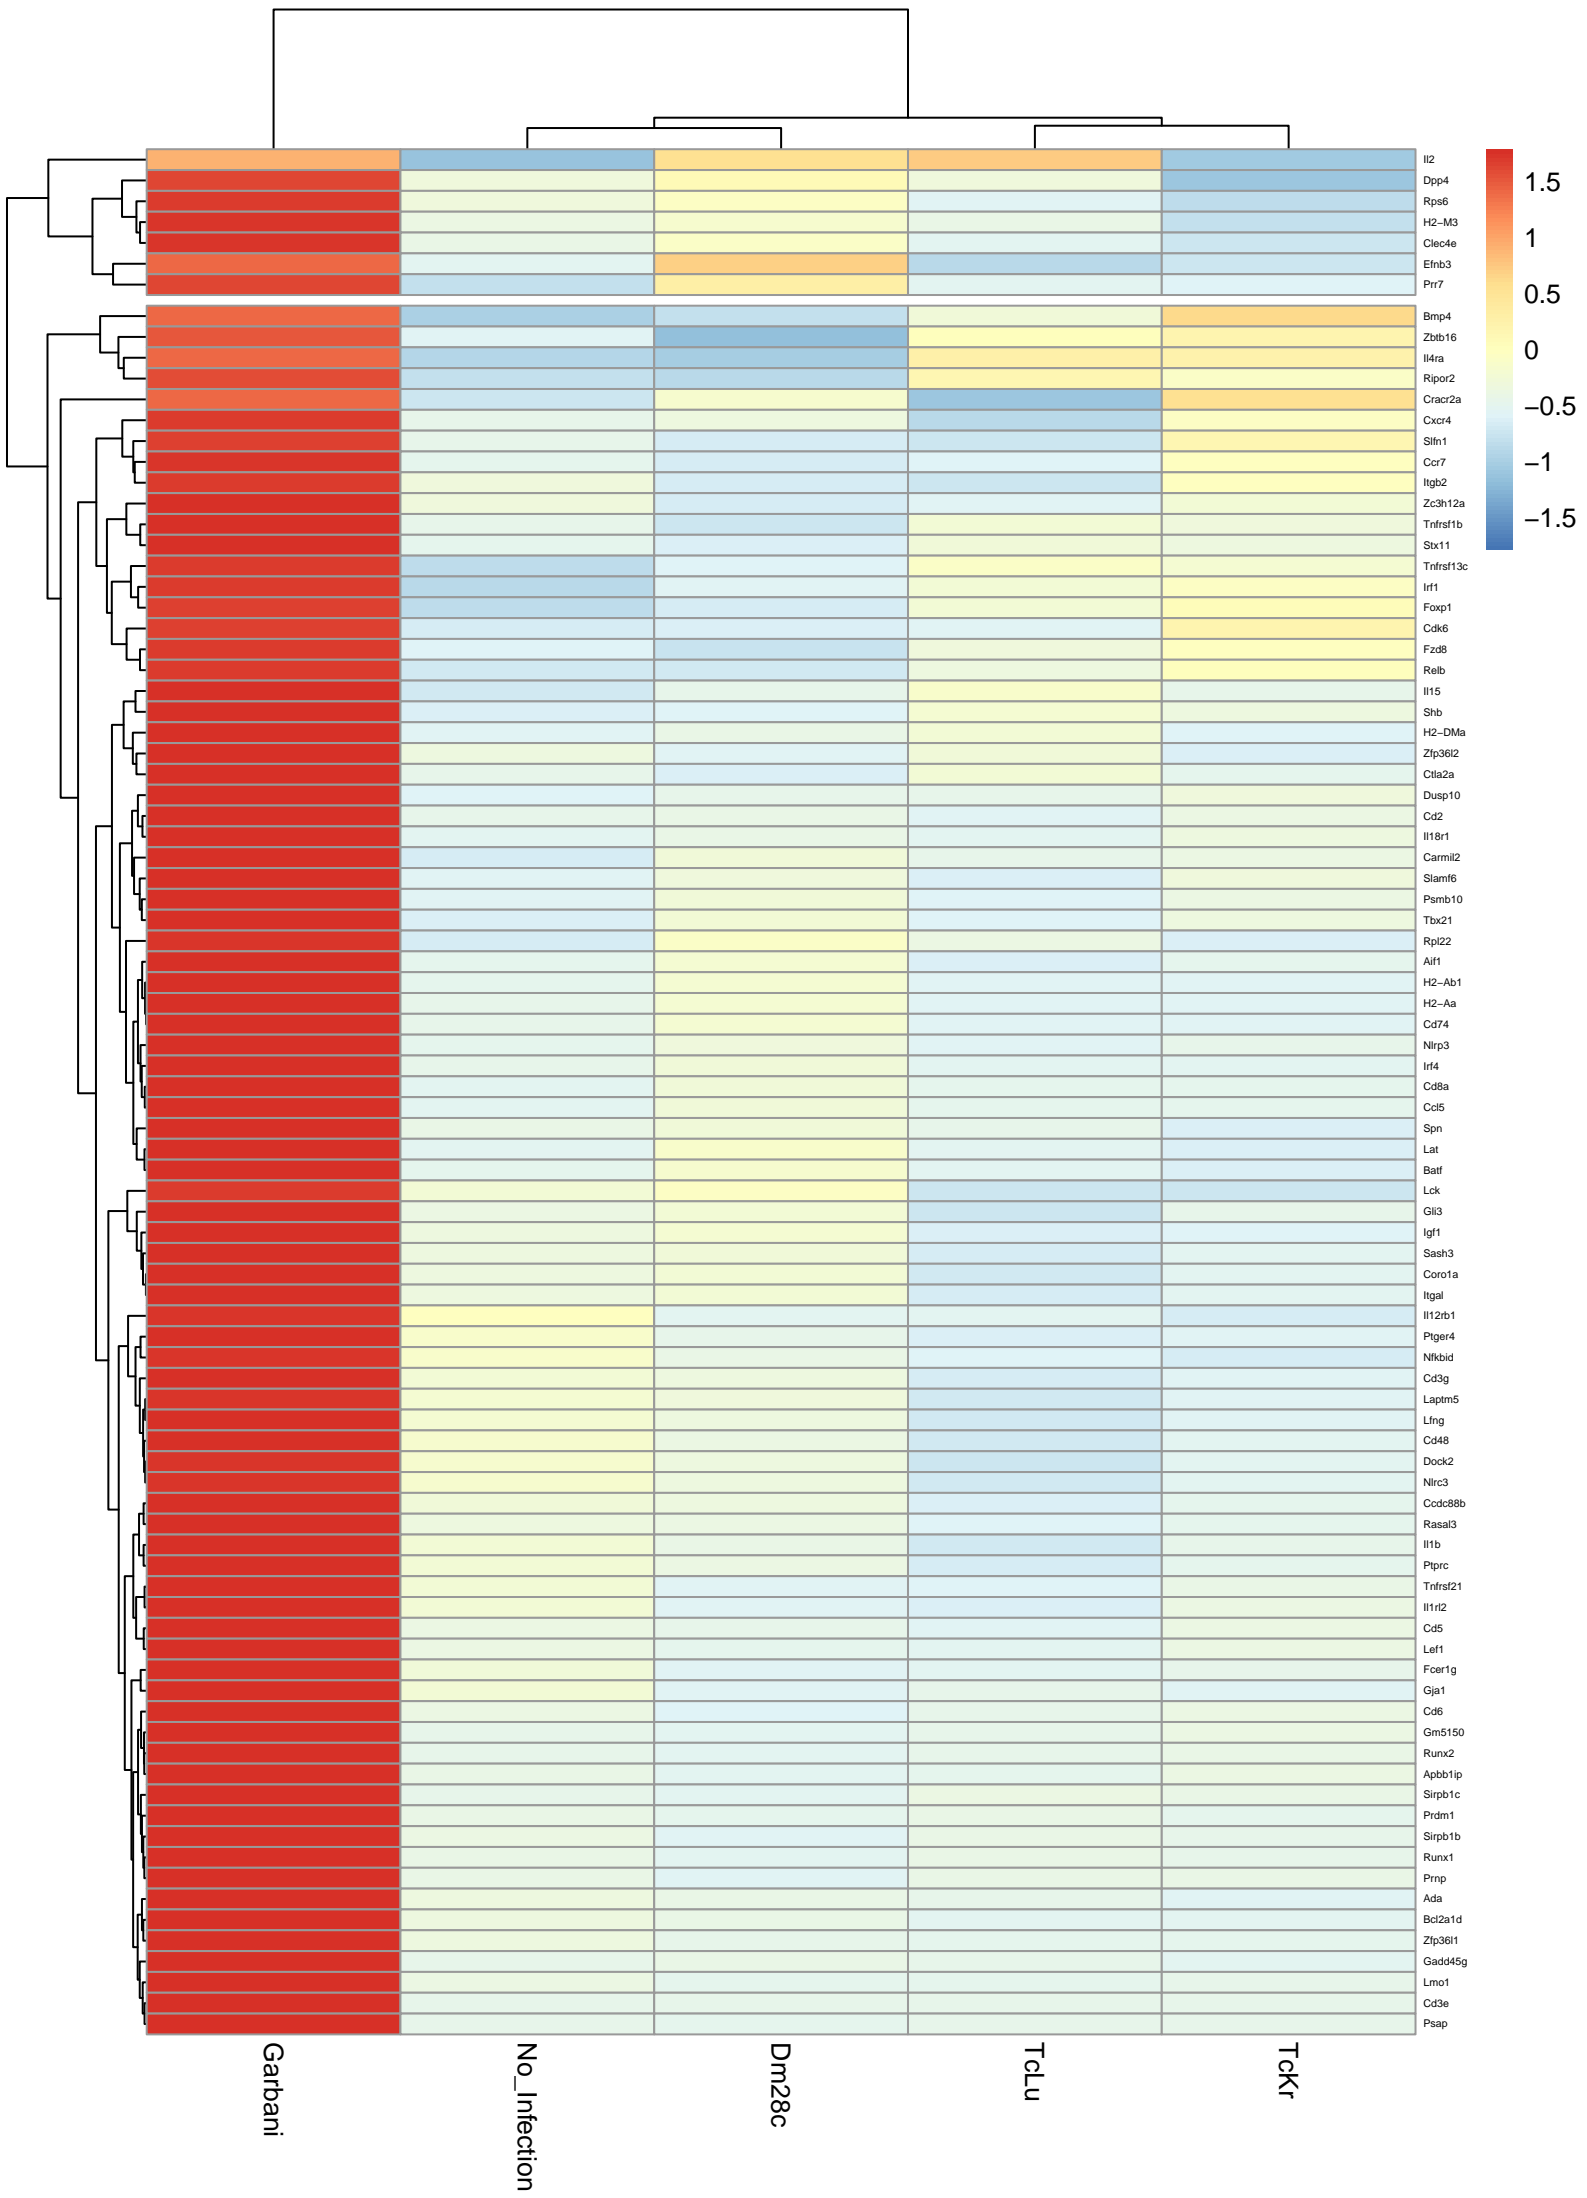

# Inflammatory response

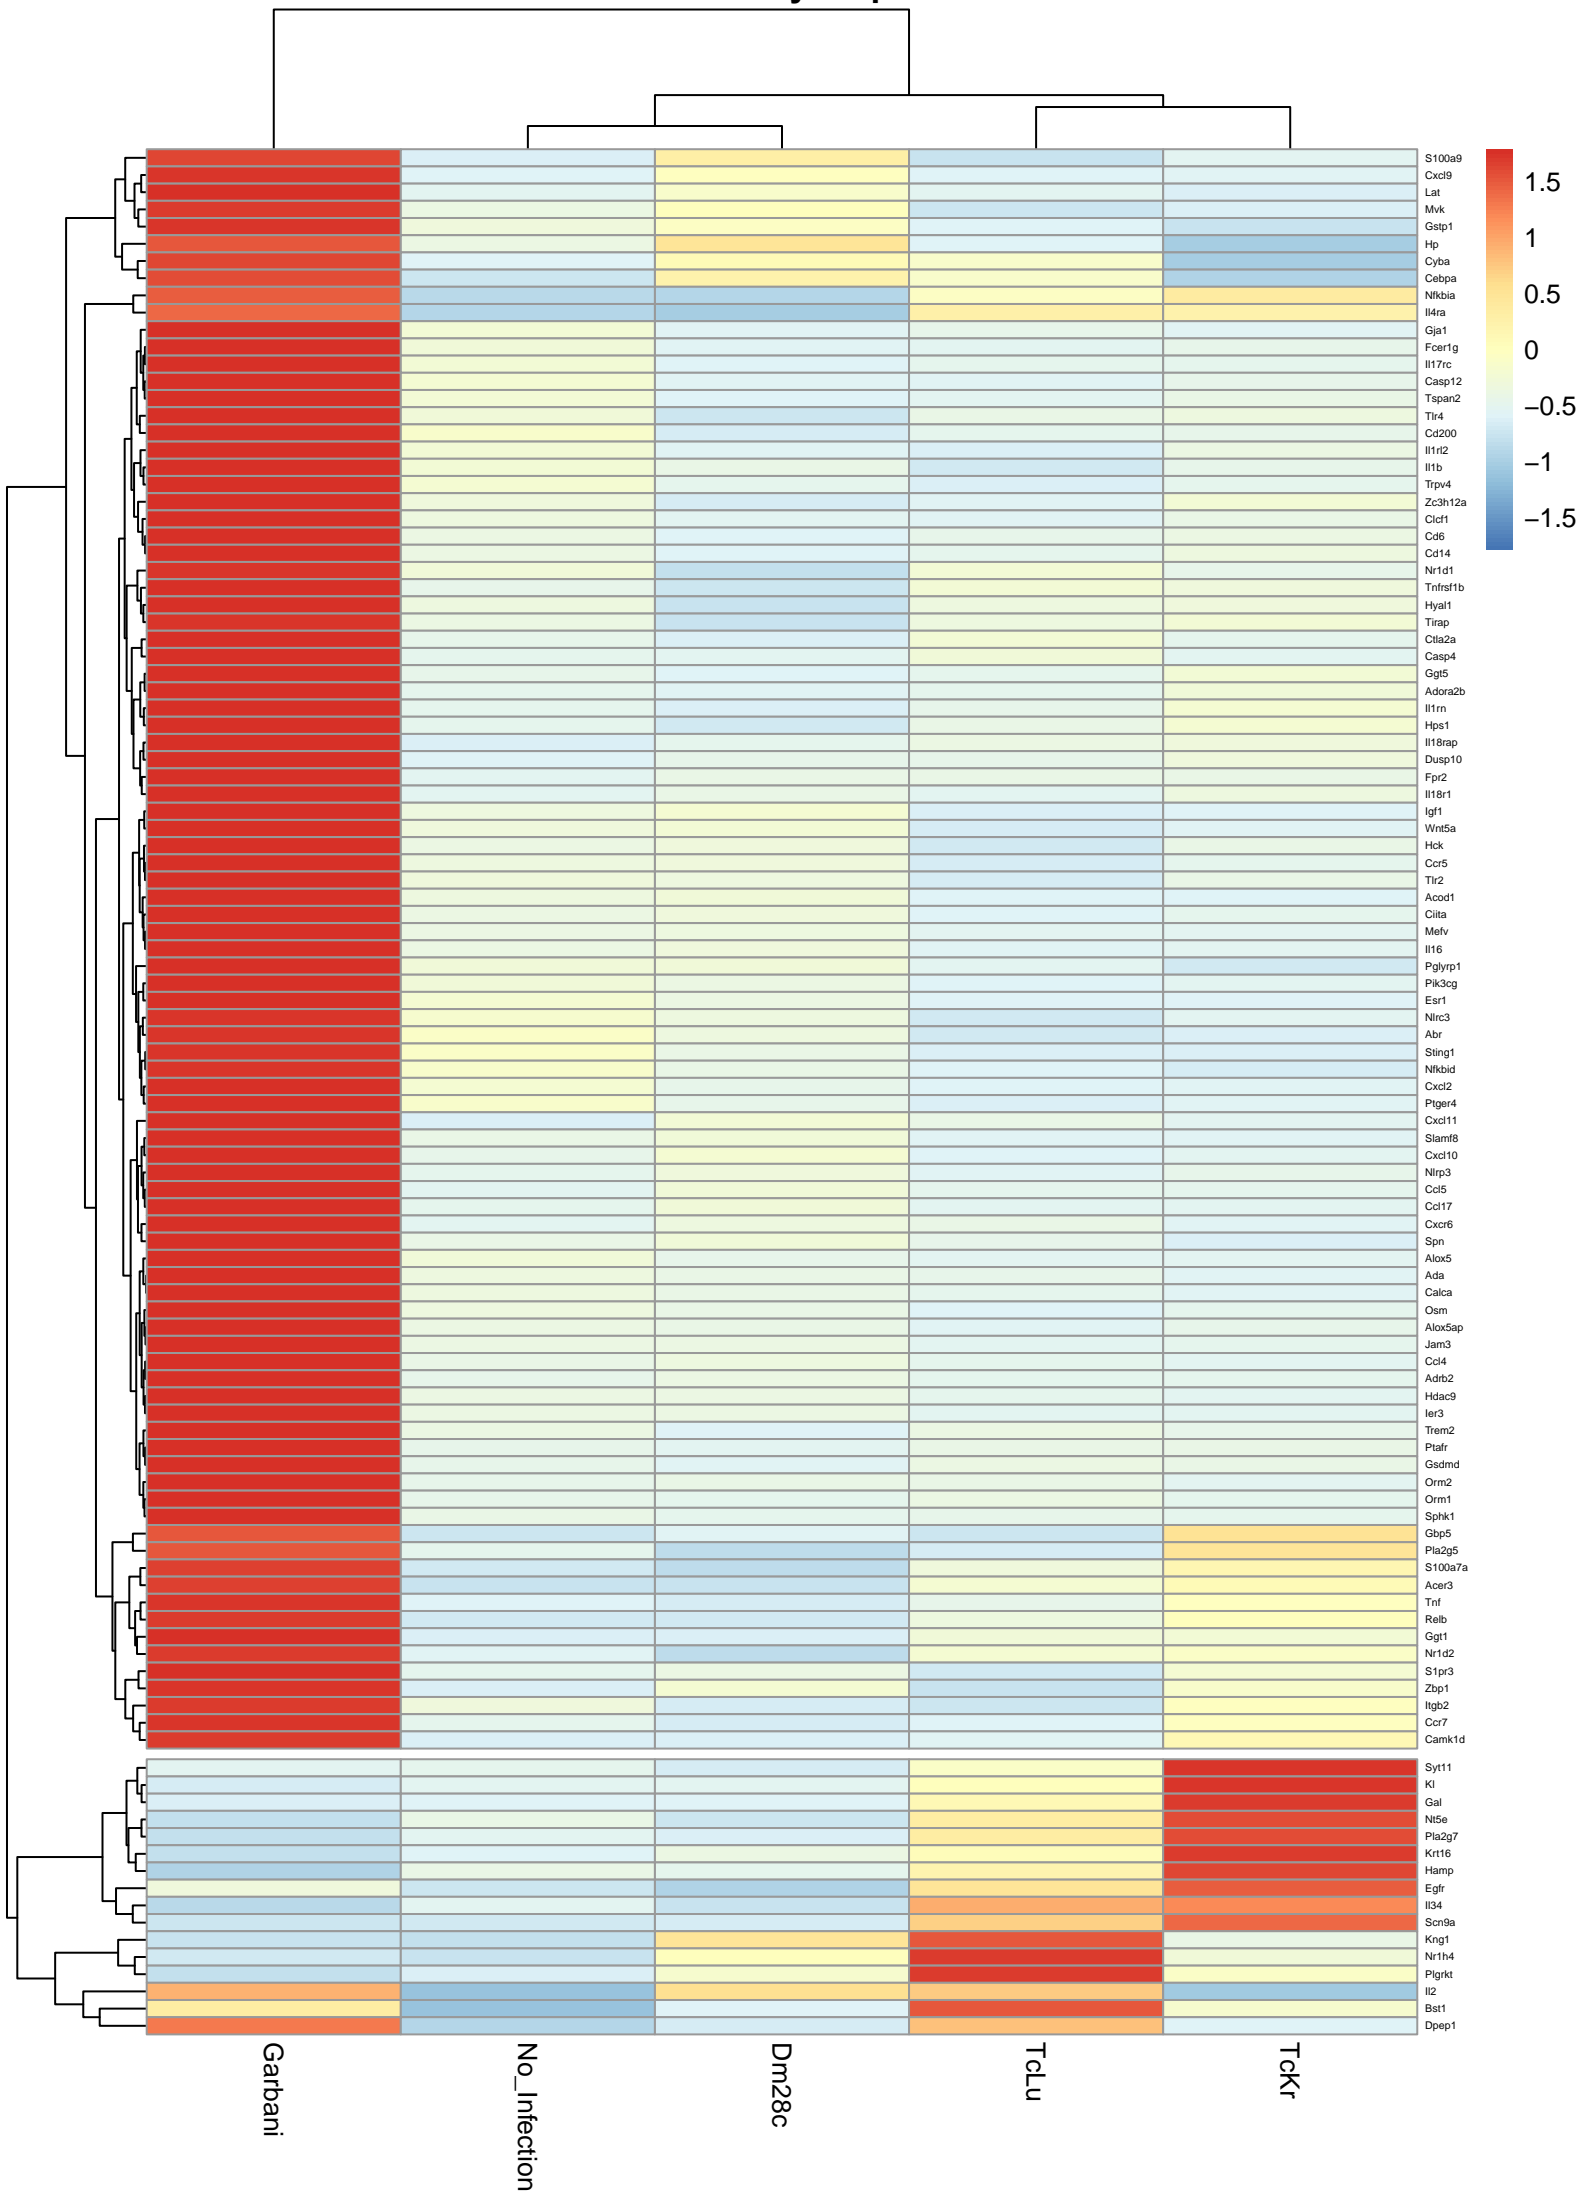

# Cell Junctions

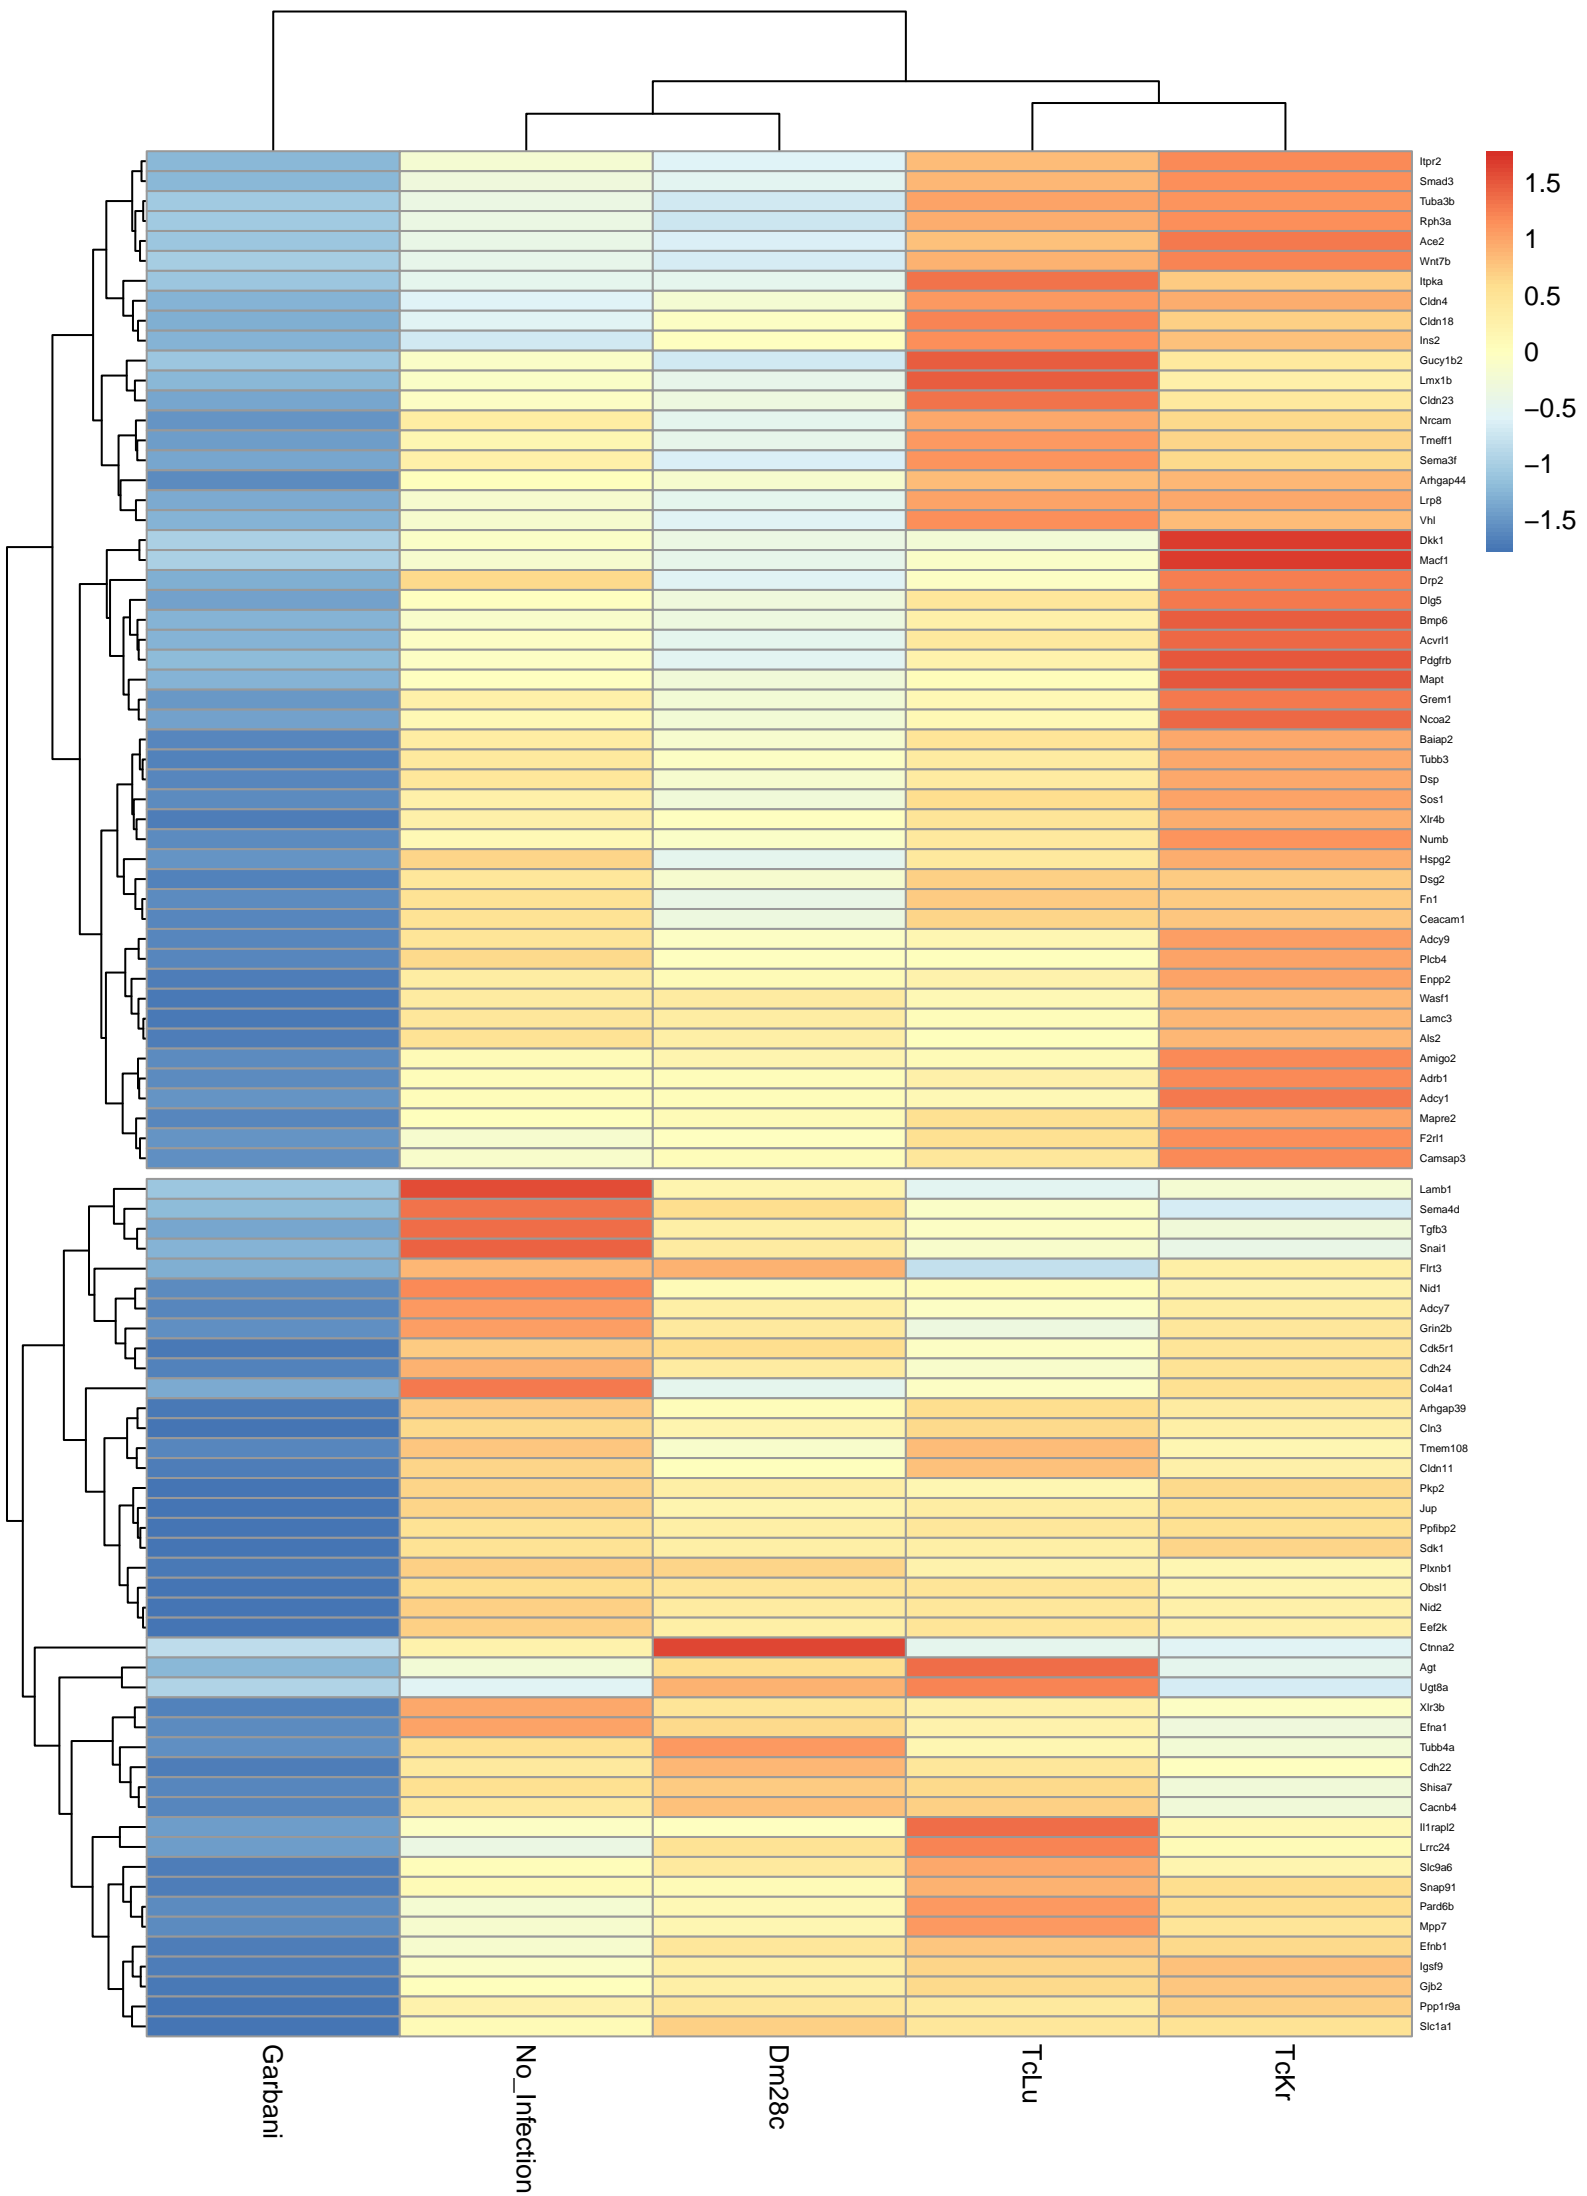



# Cell Cycle and Others

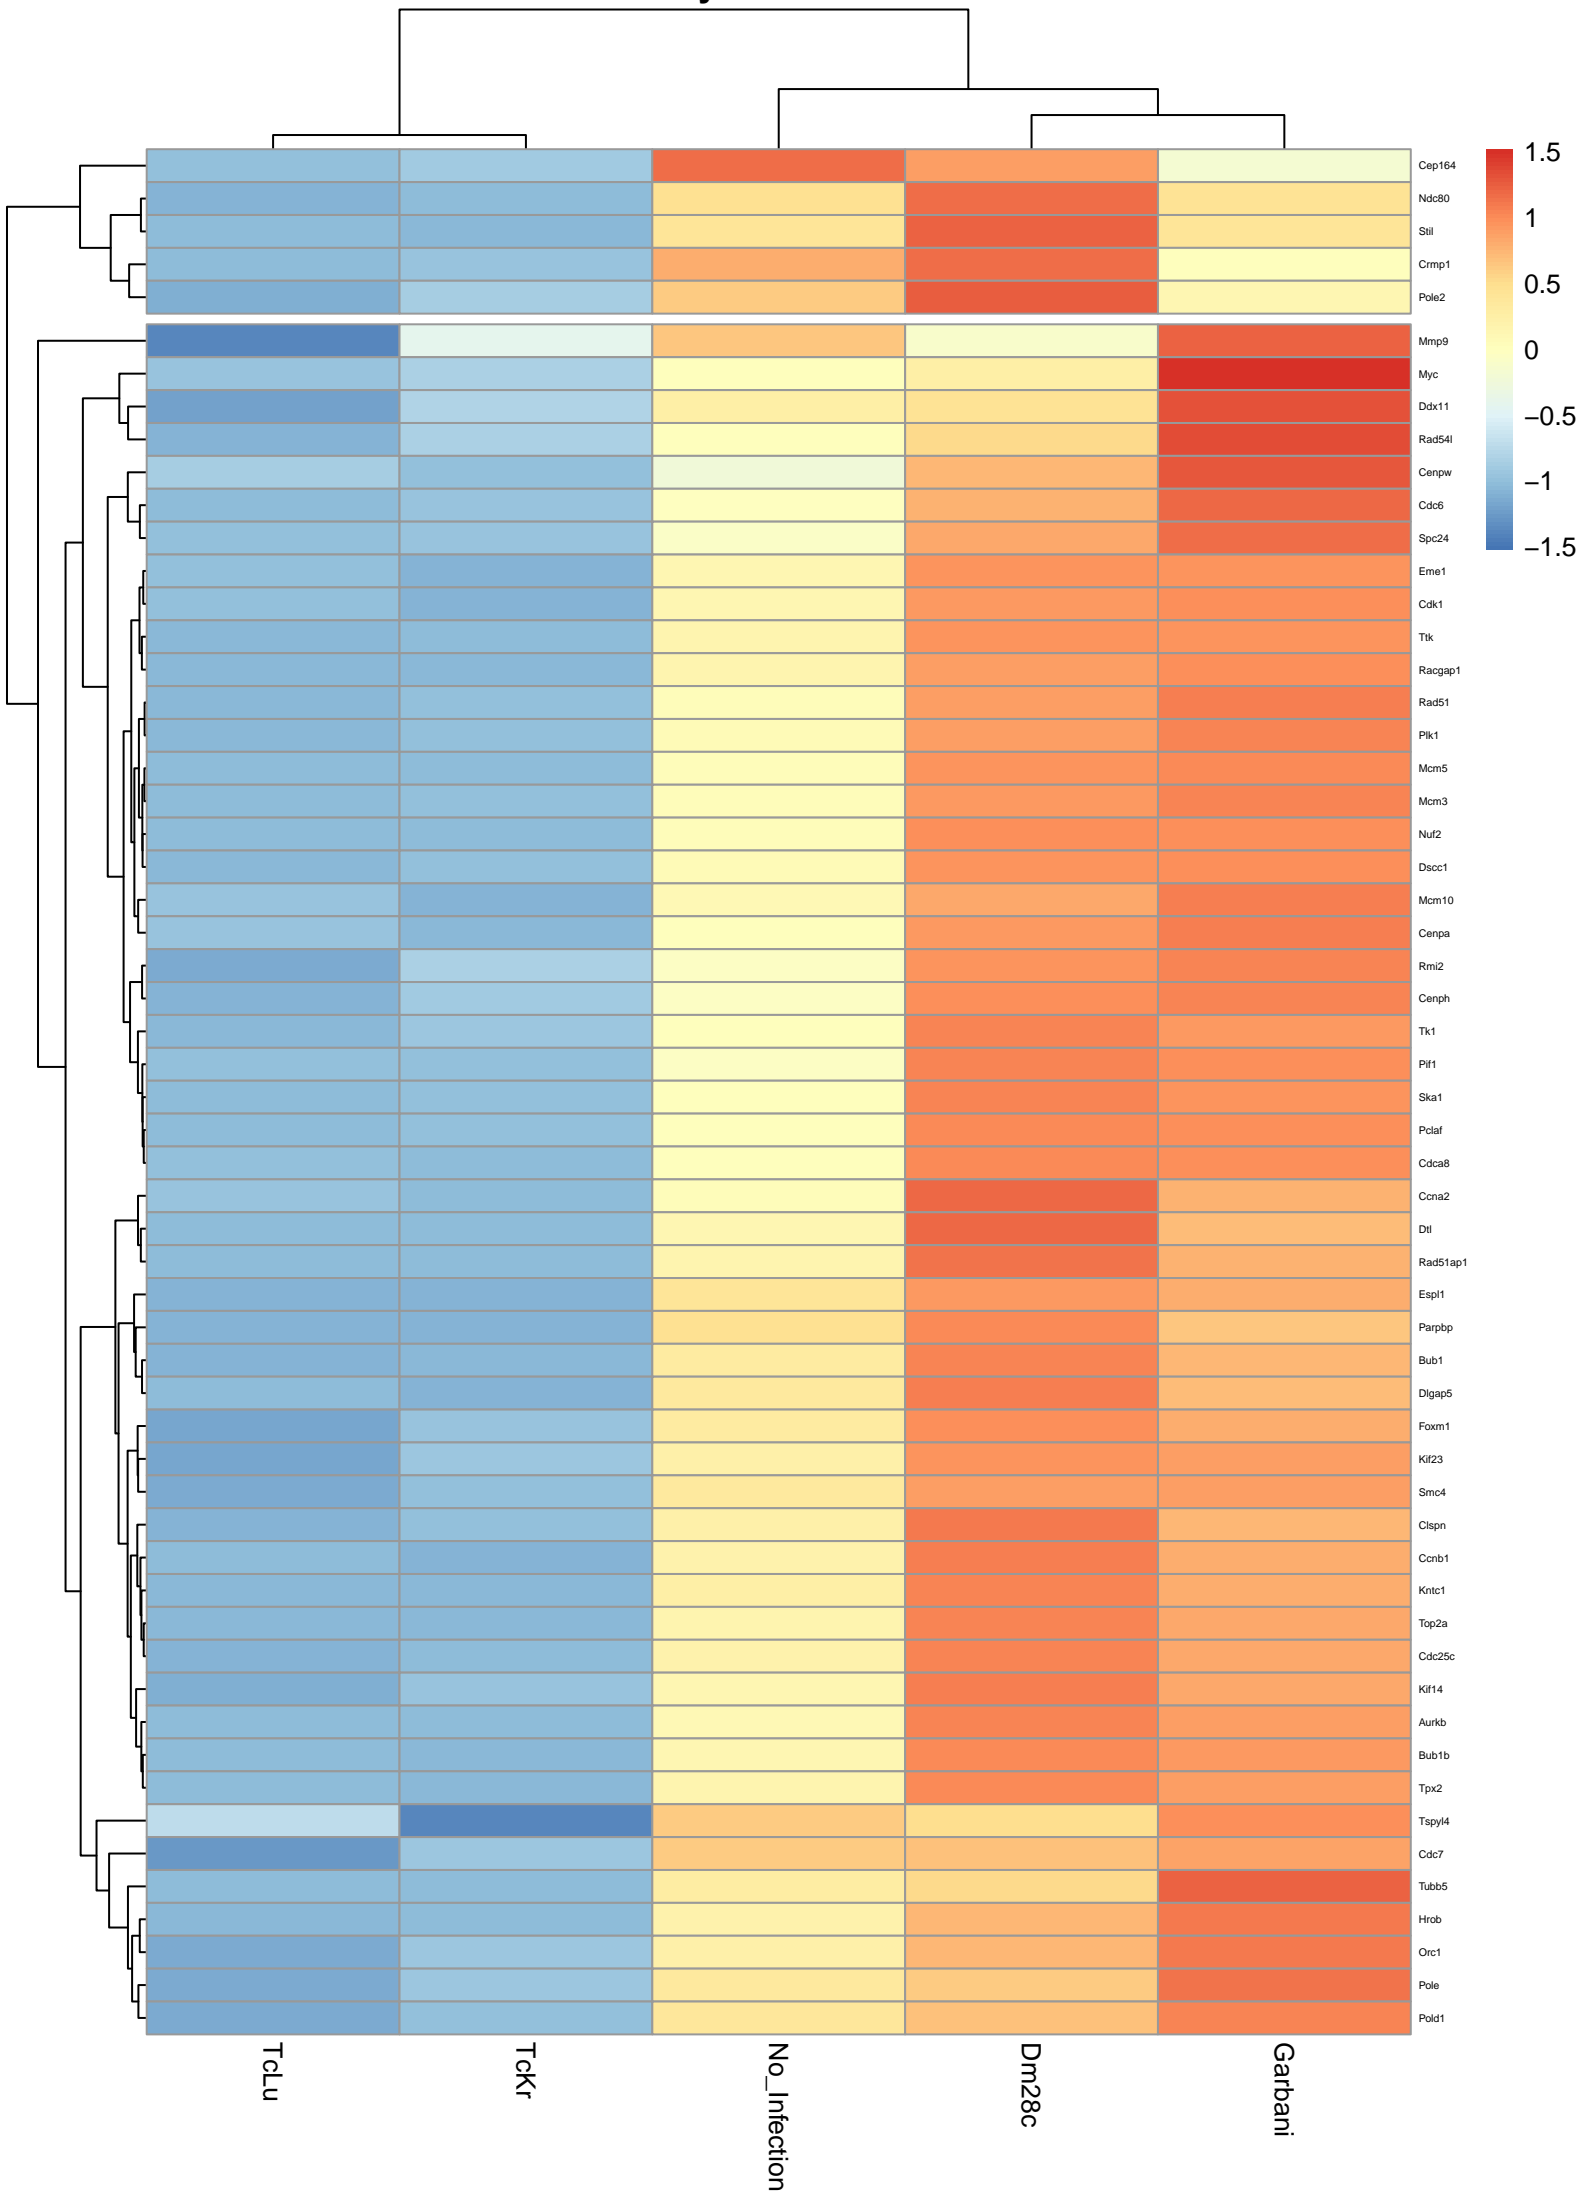

# Mitotic Cell Cycle Process

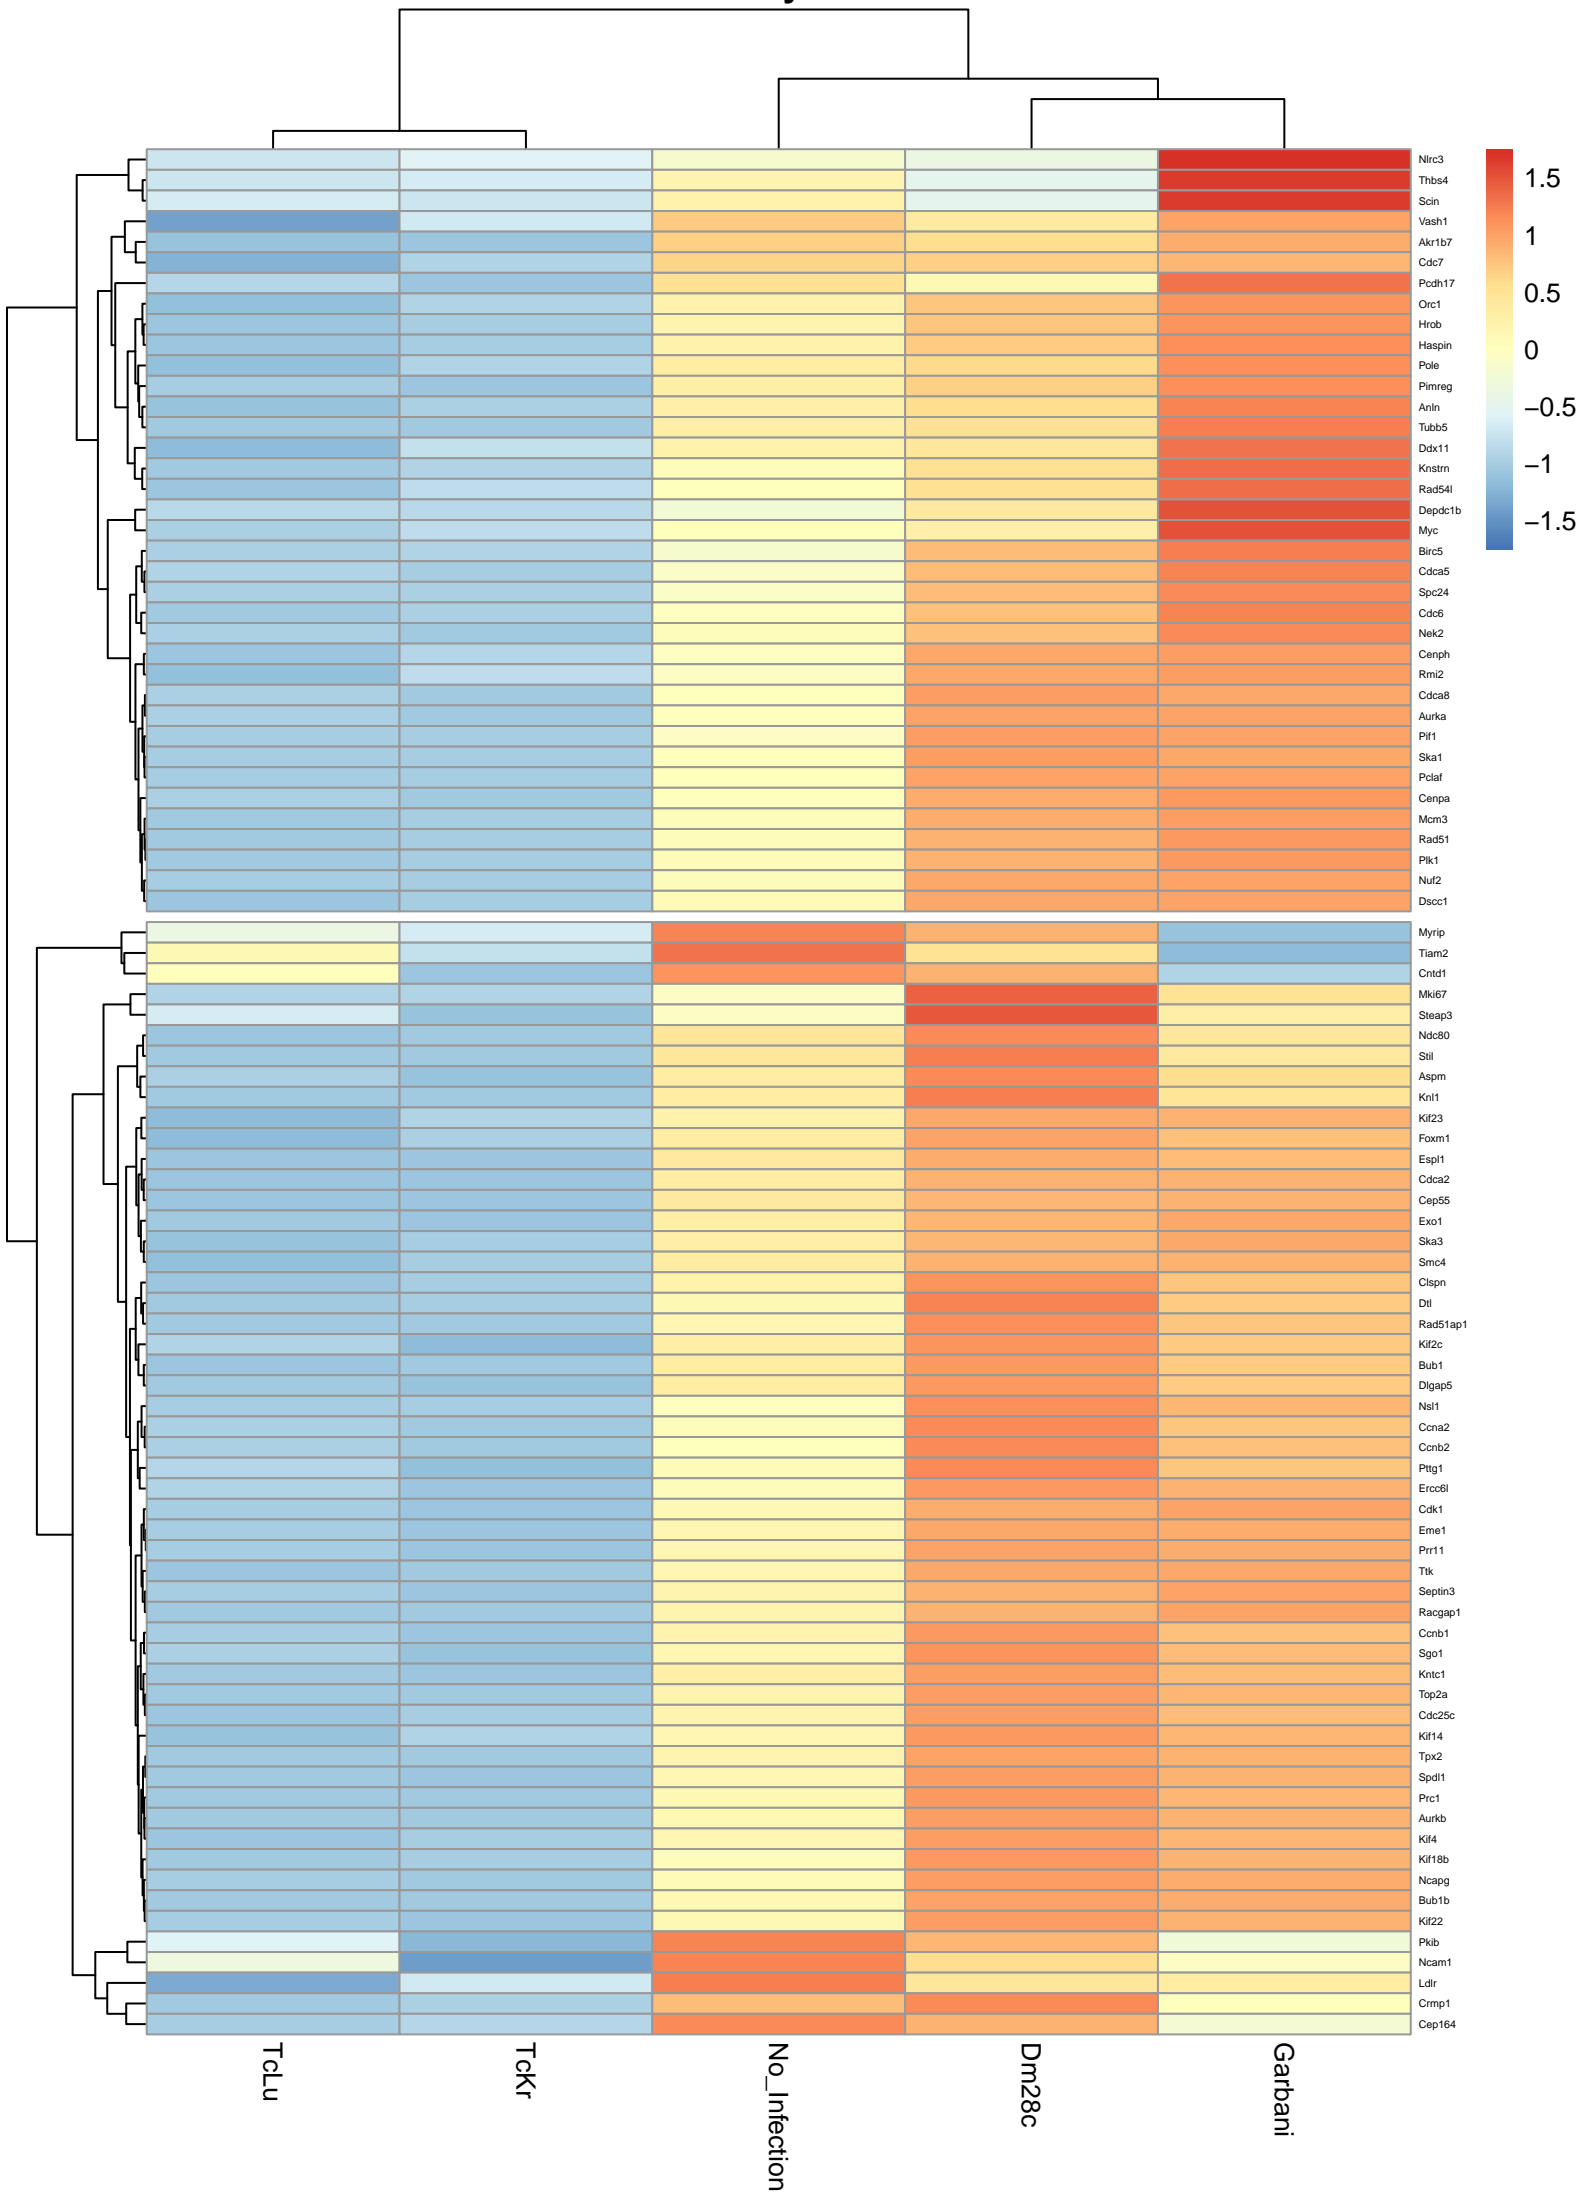

# Cell Projections and Morphogenesis

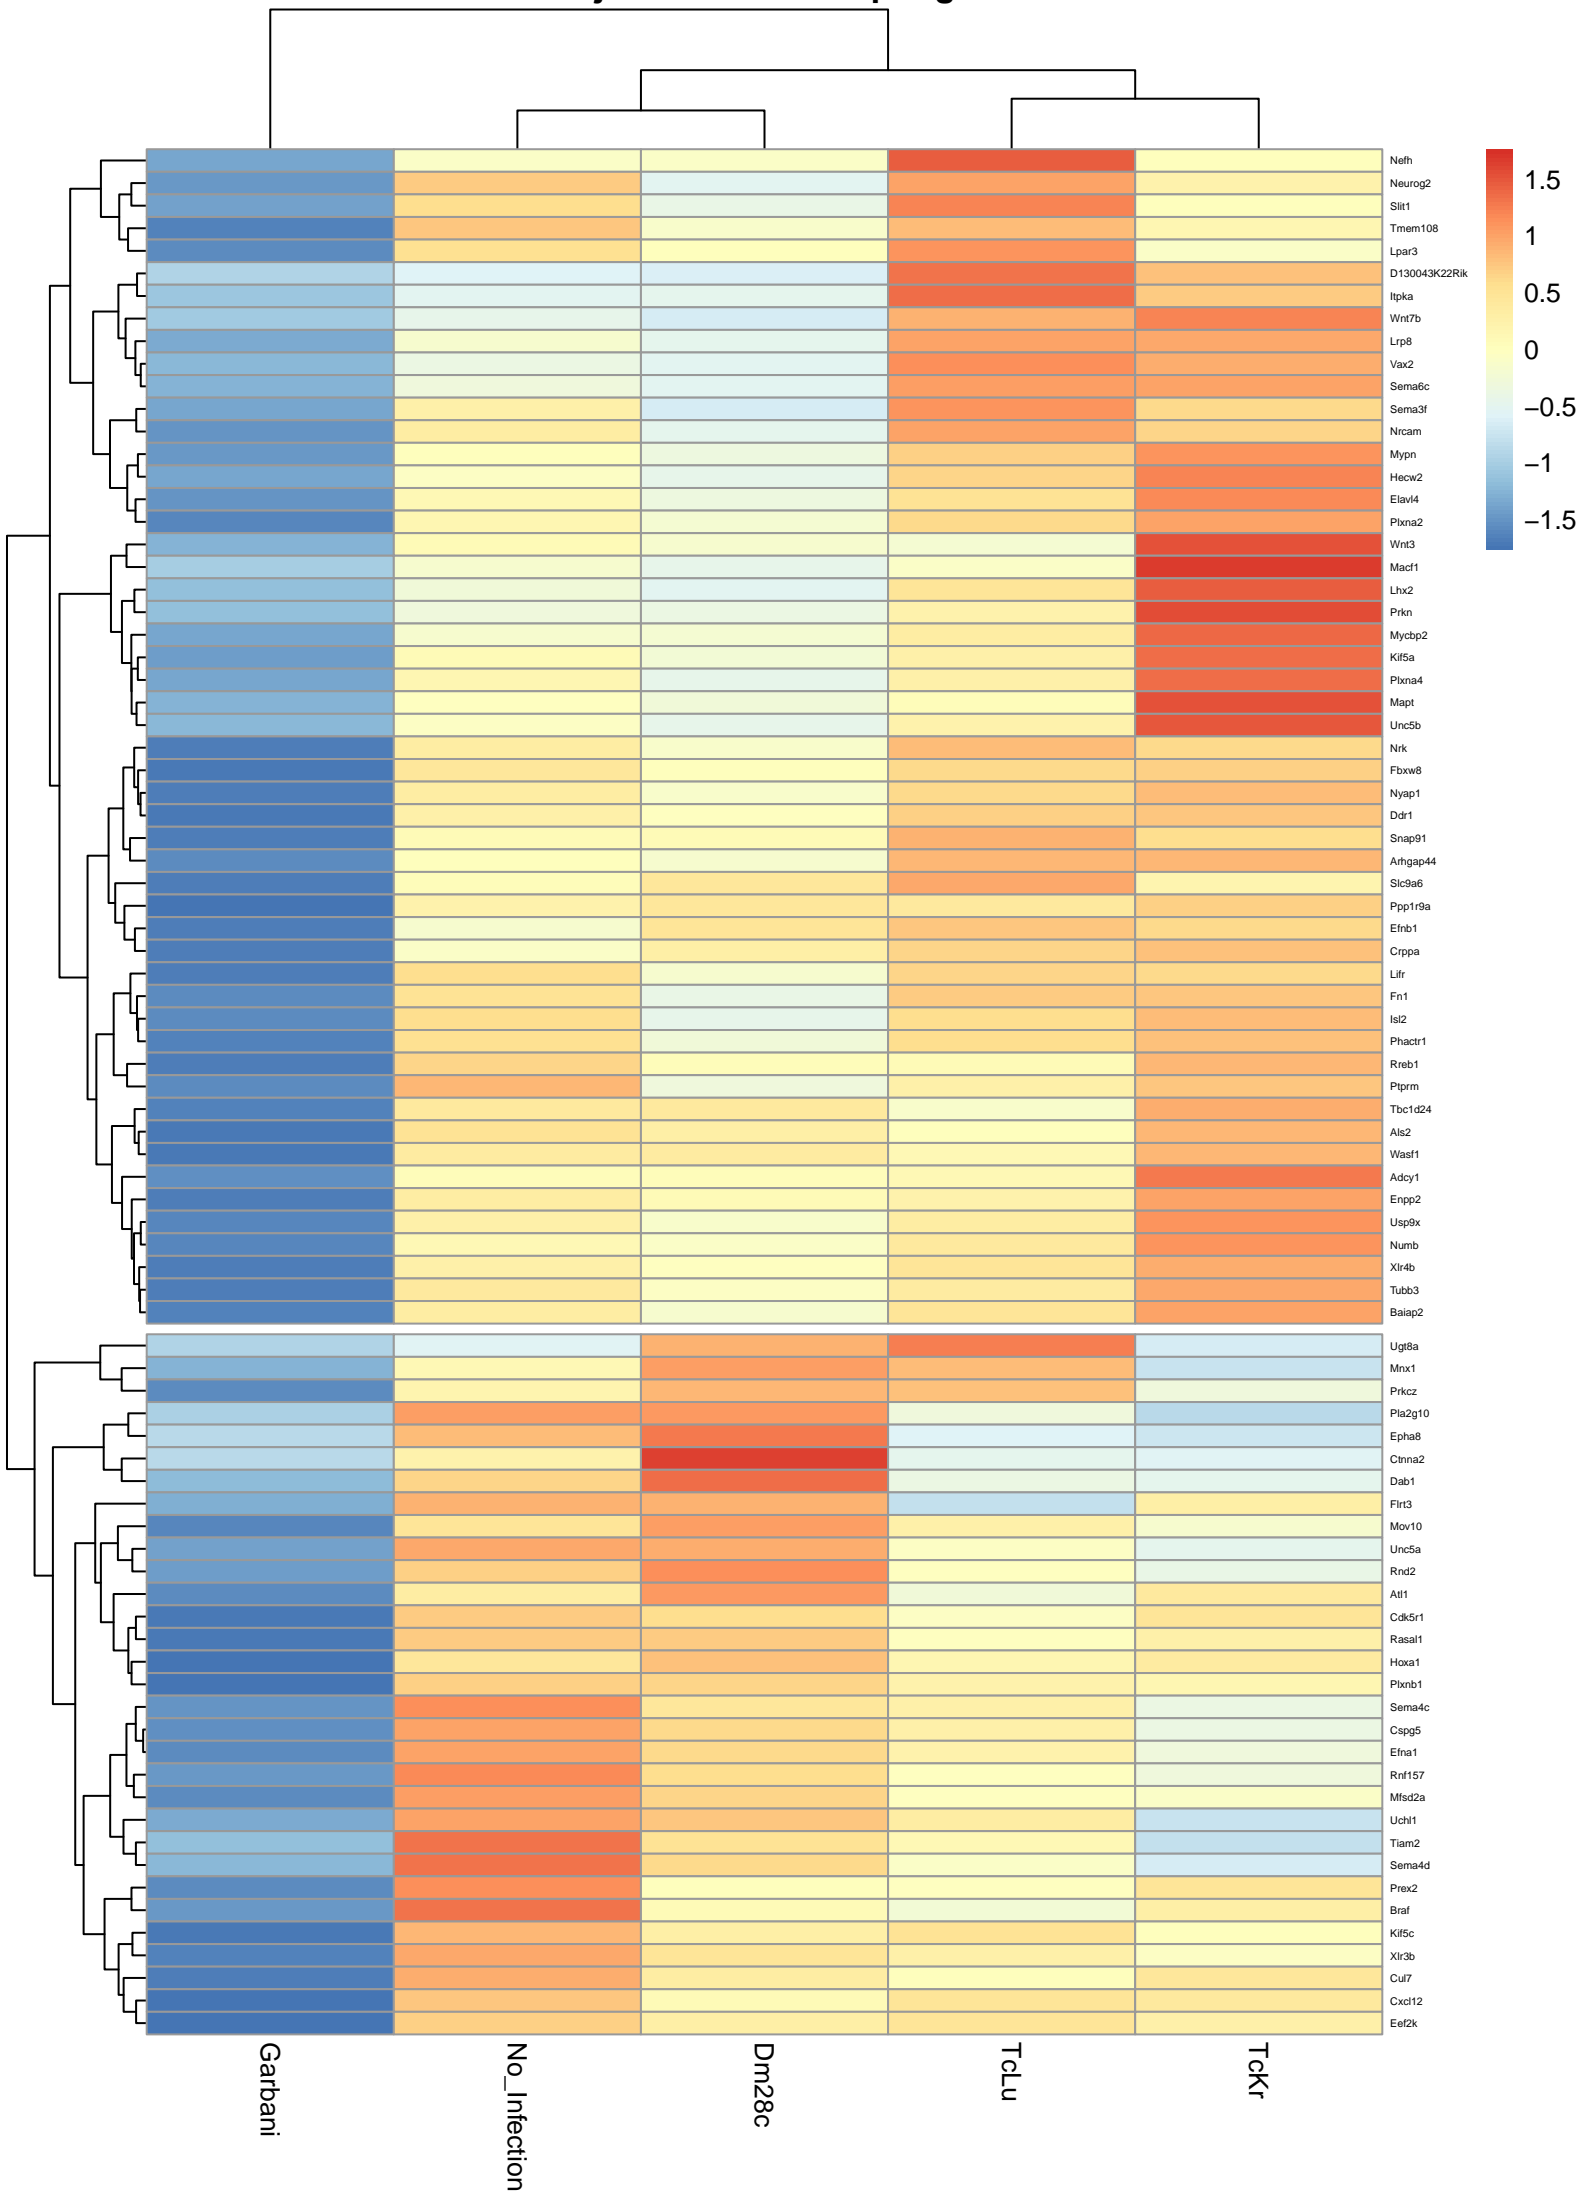

# Import to the Cell

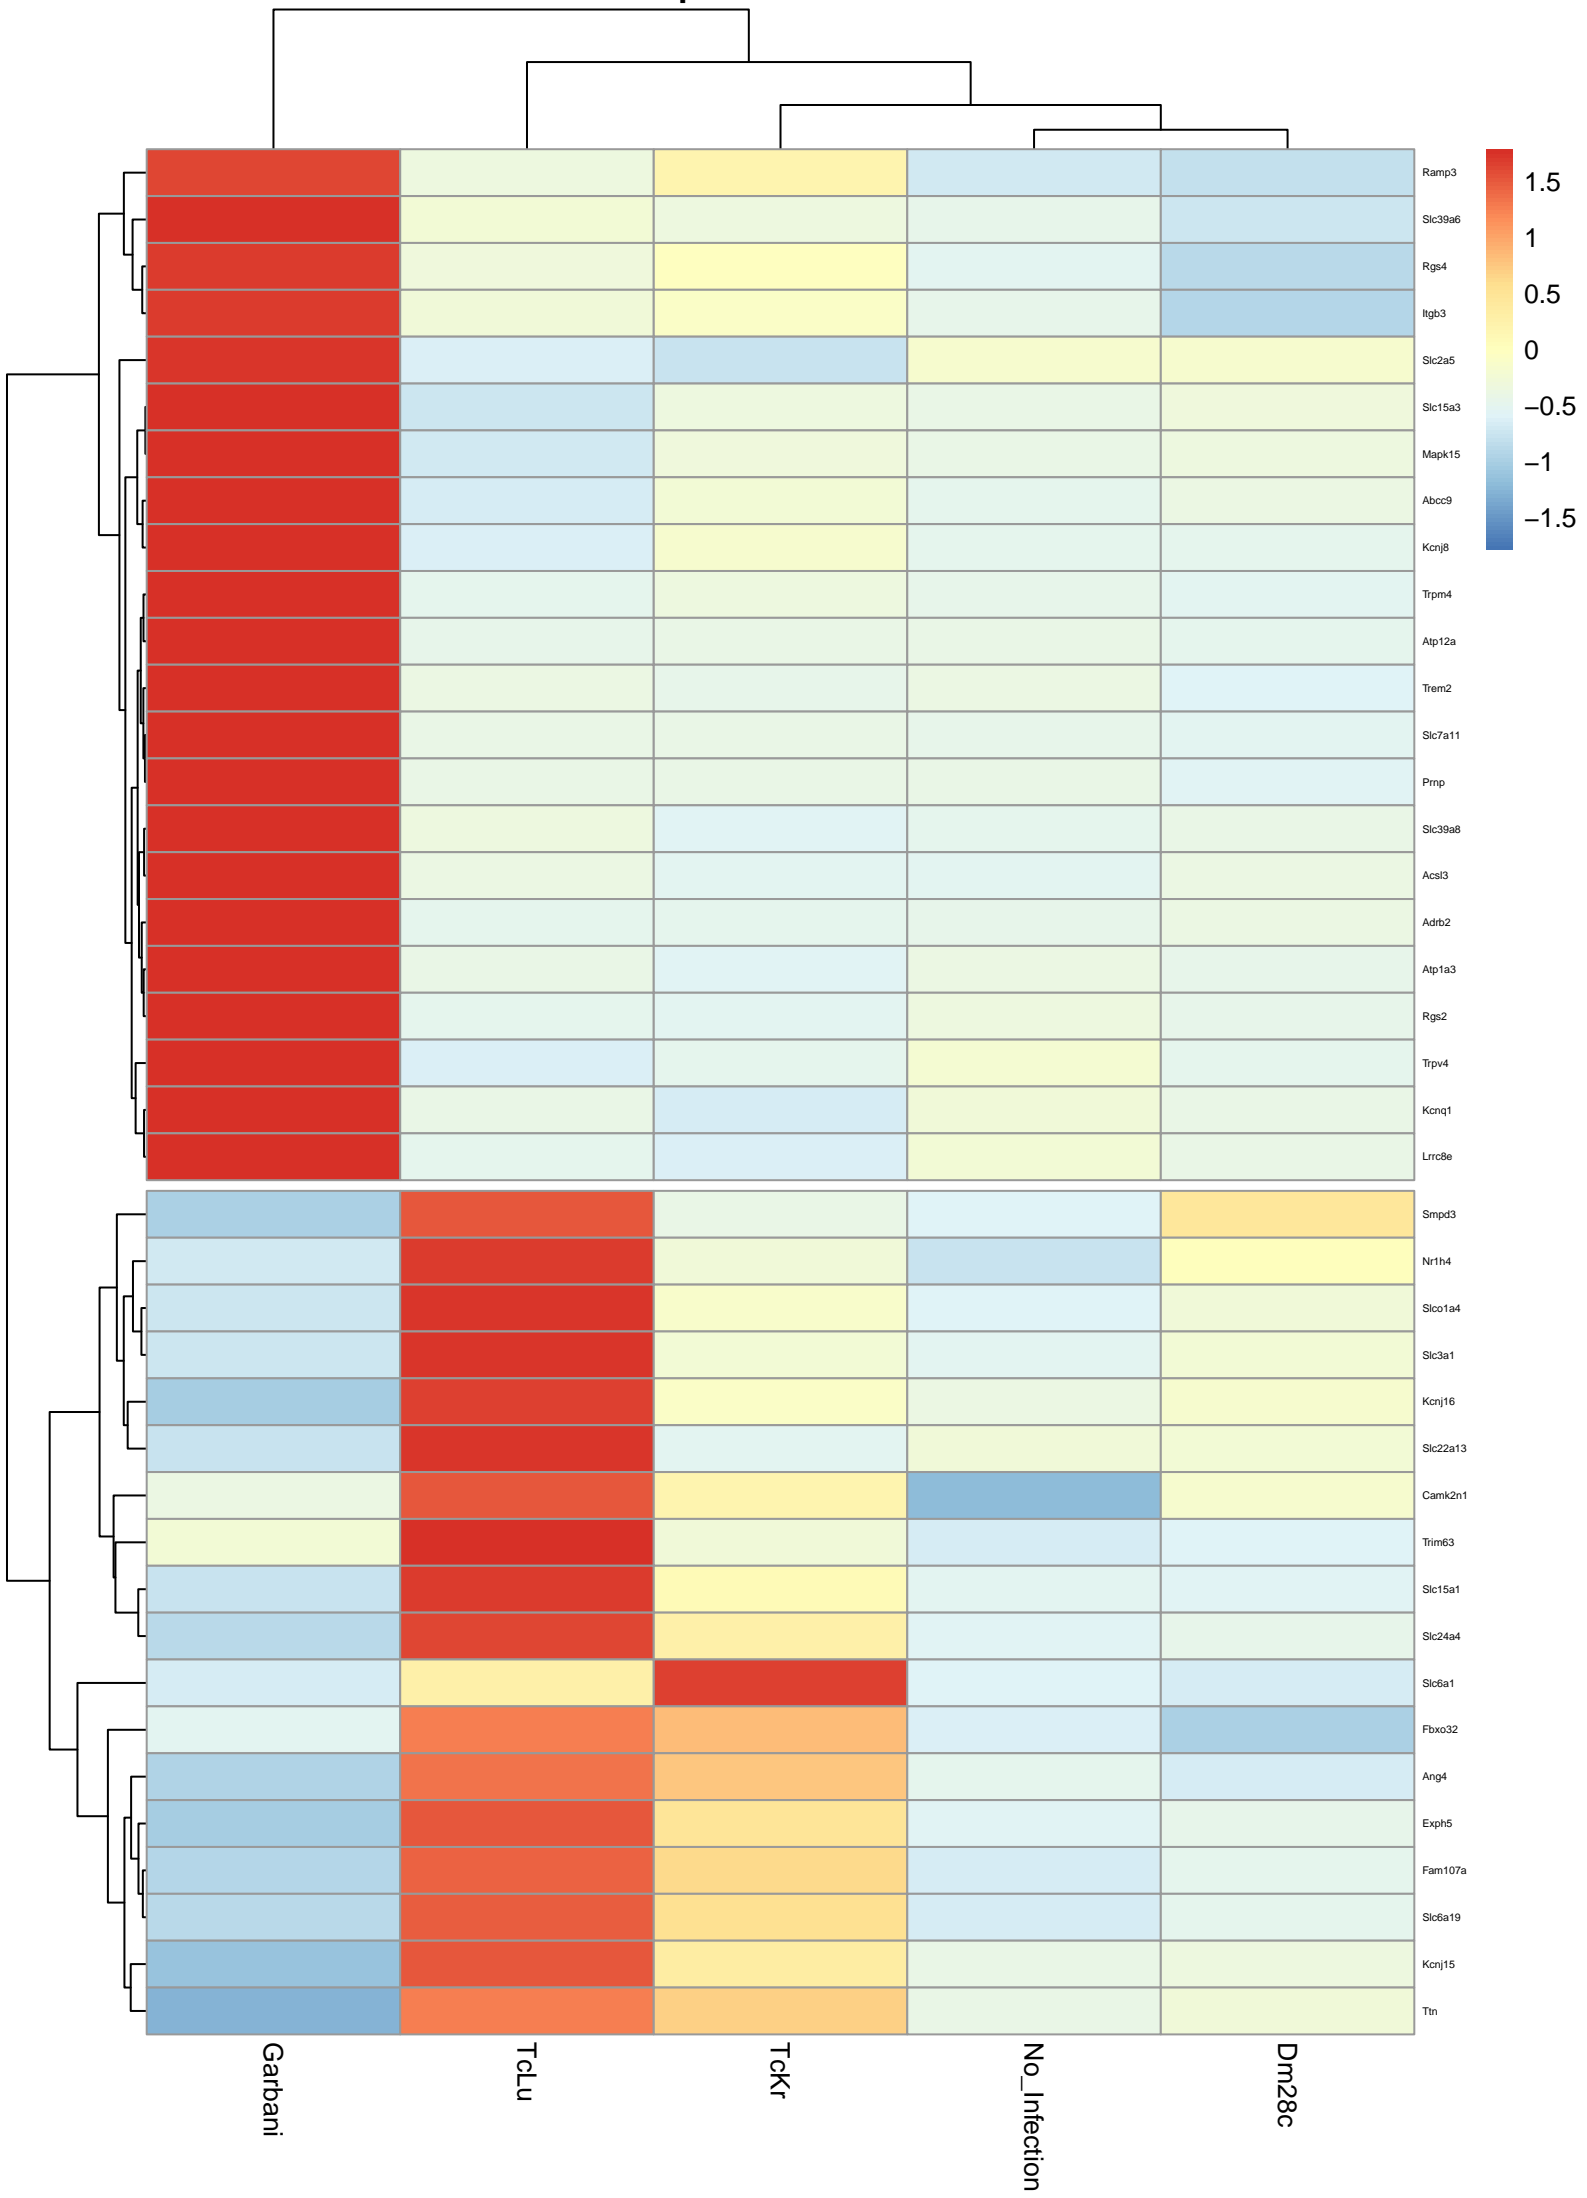

# Positive Regulation of Secretion and Import

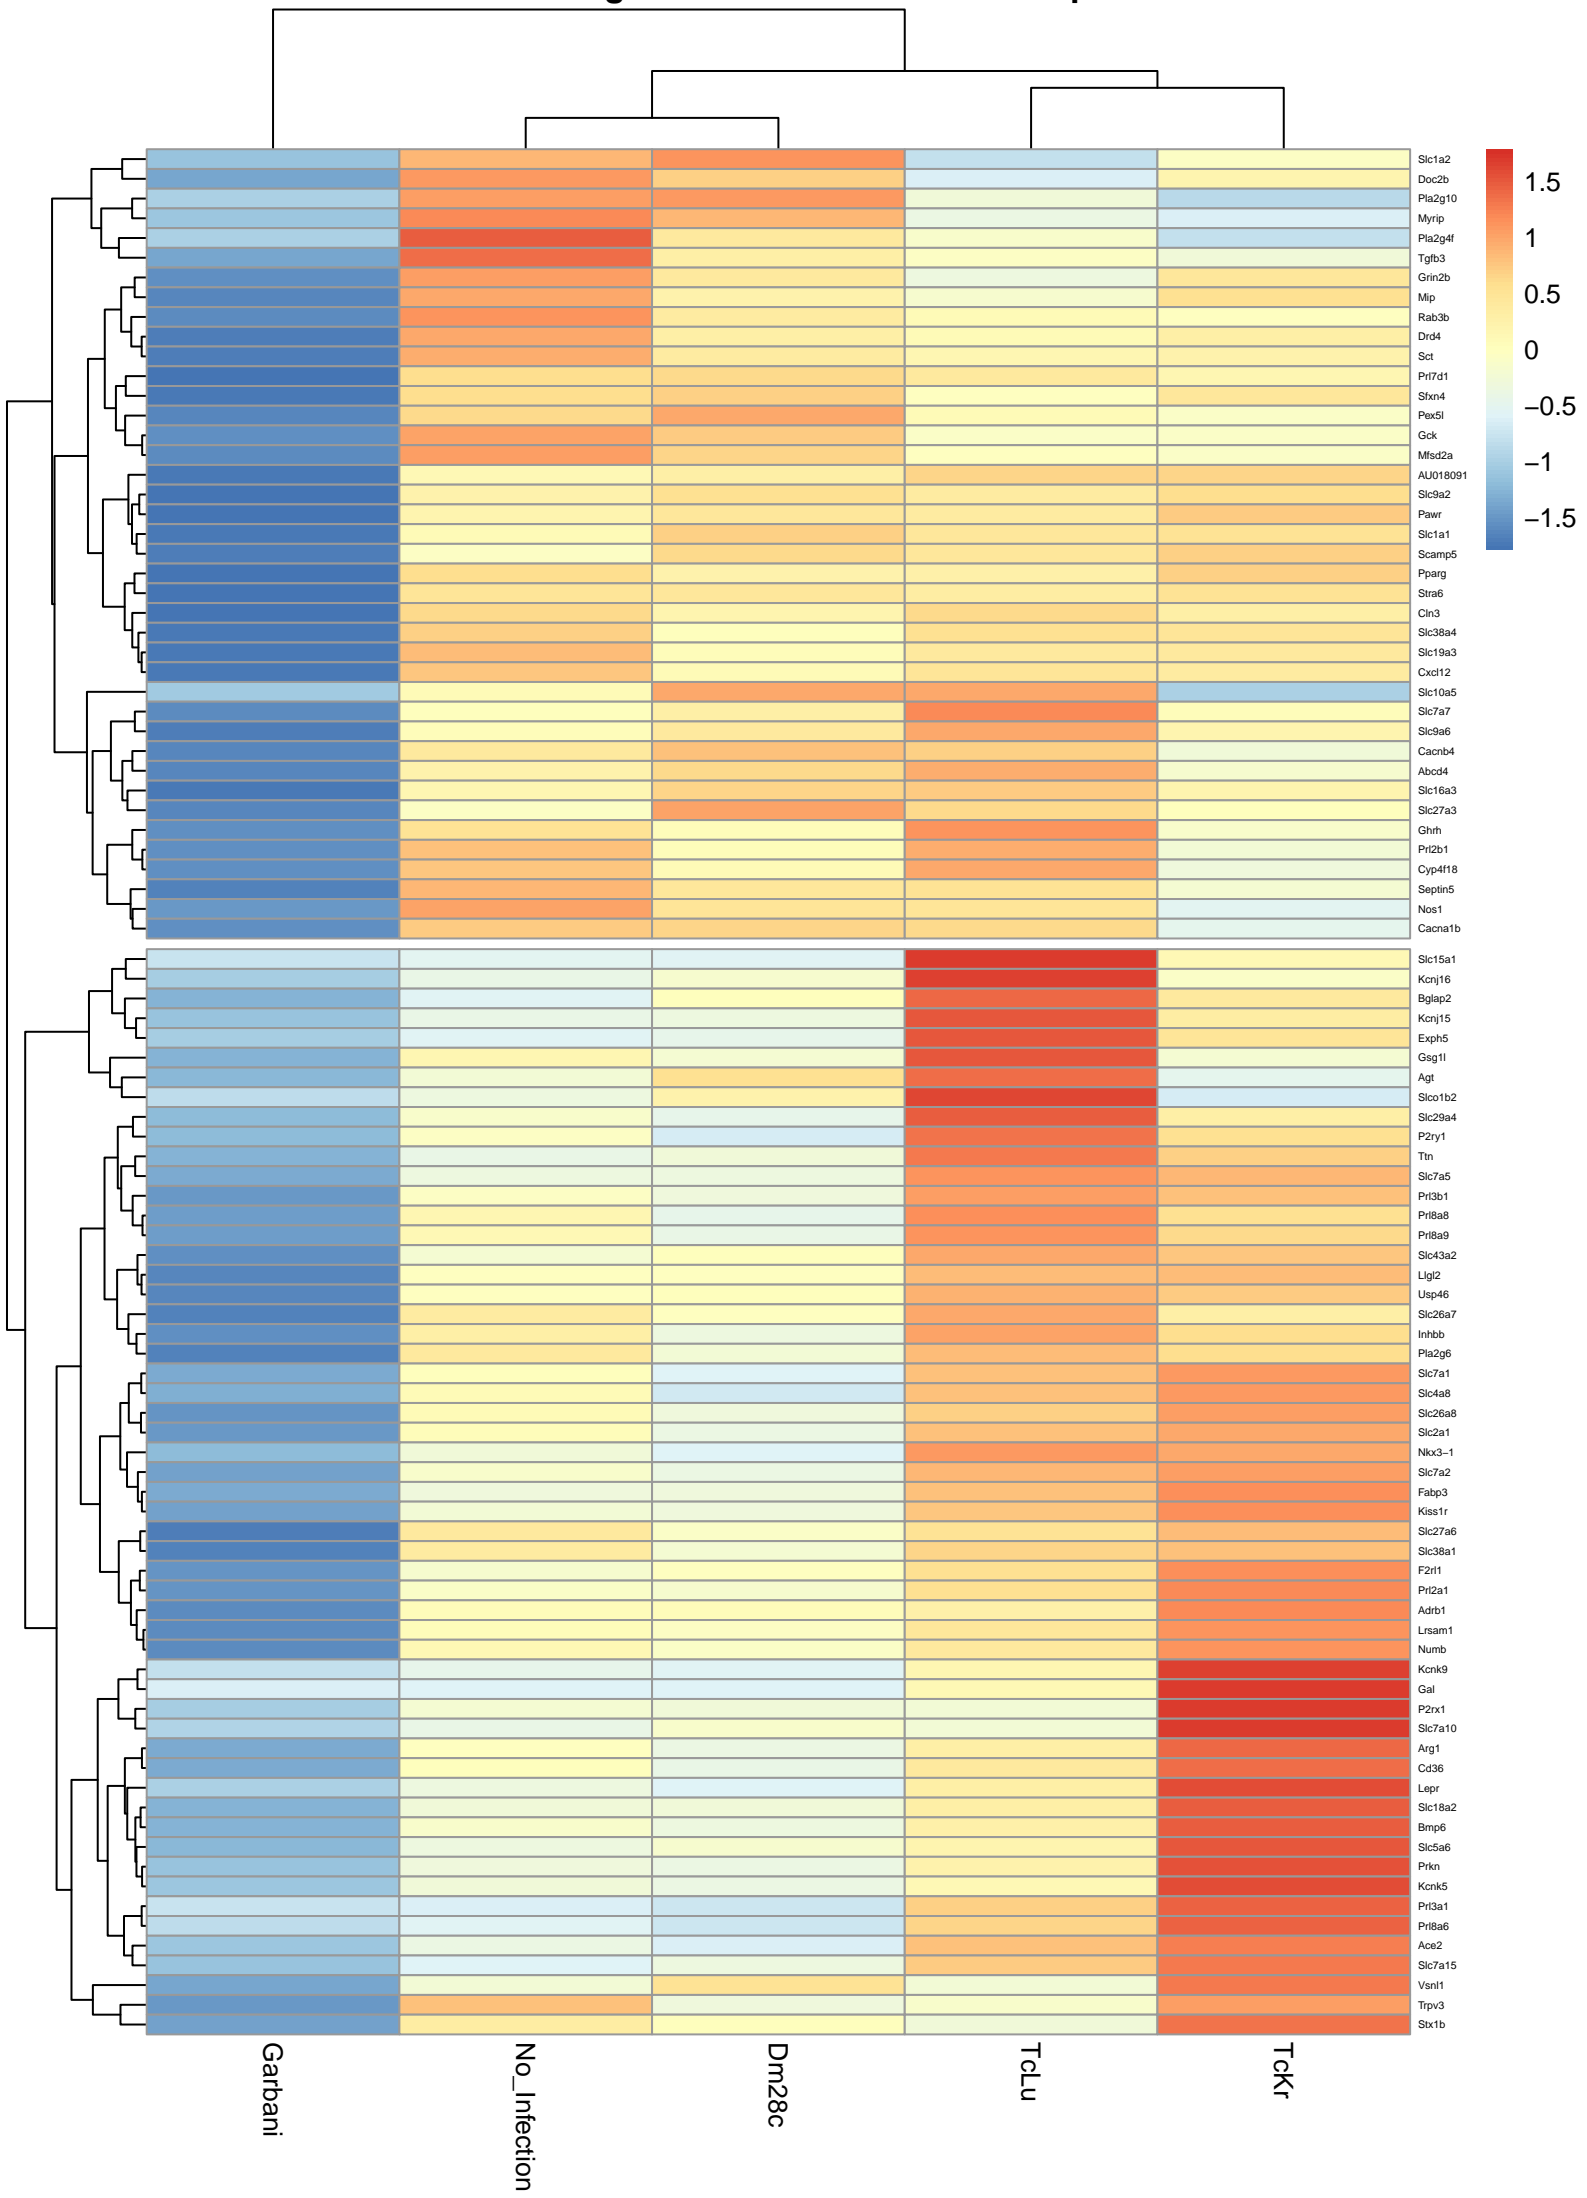

# Positive Regulation of Secretion

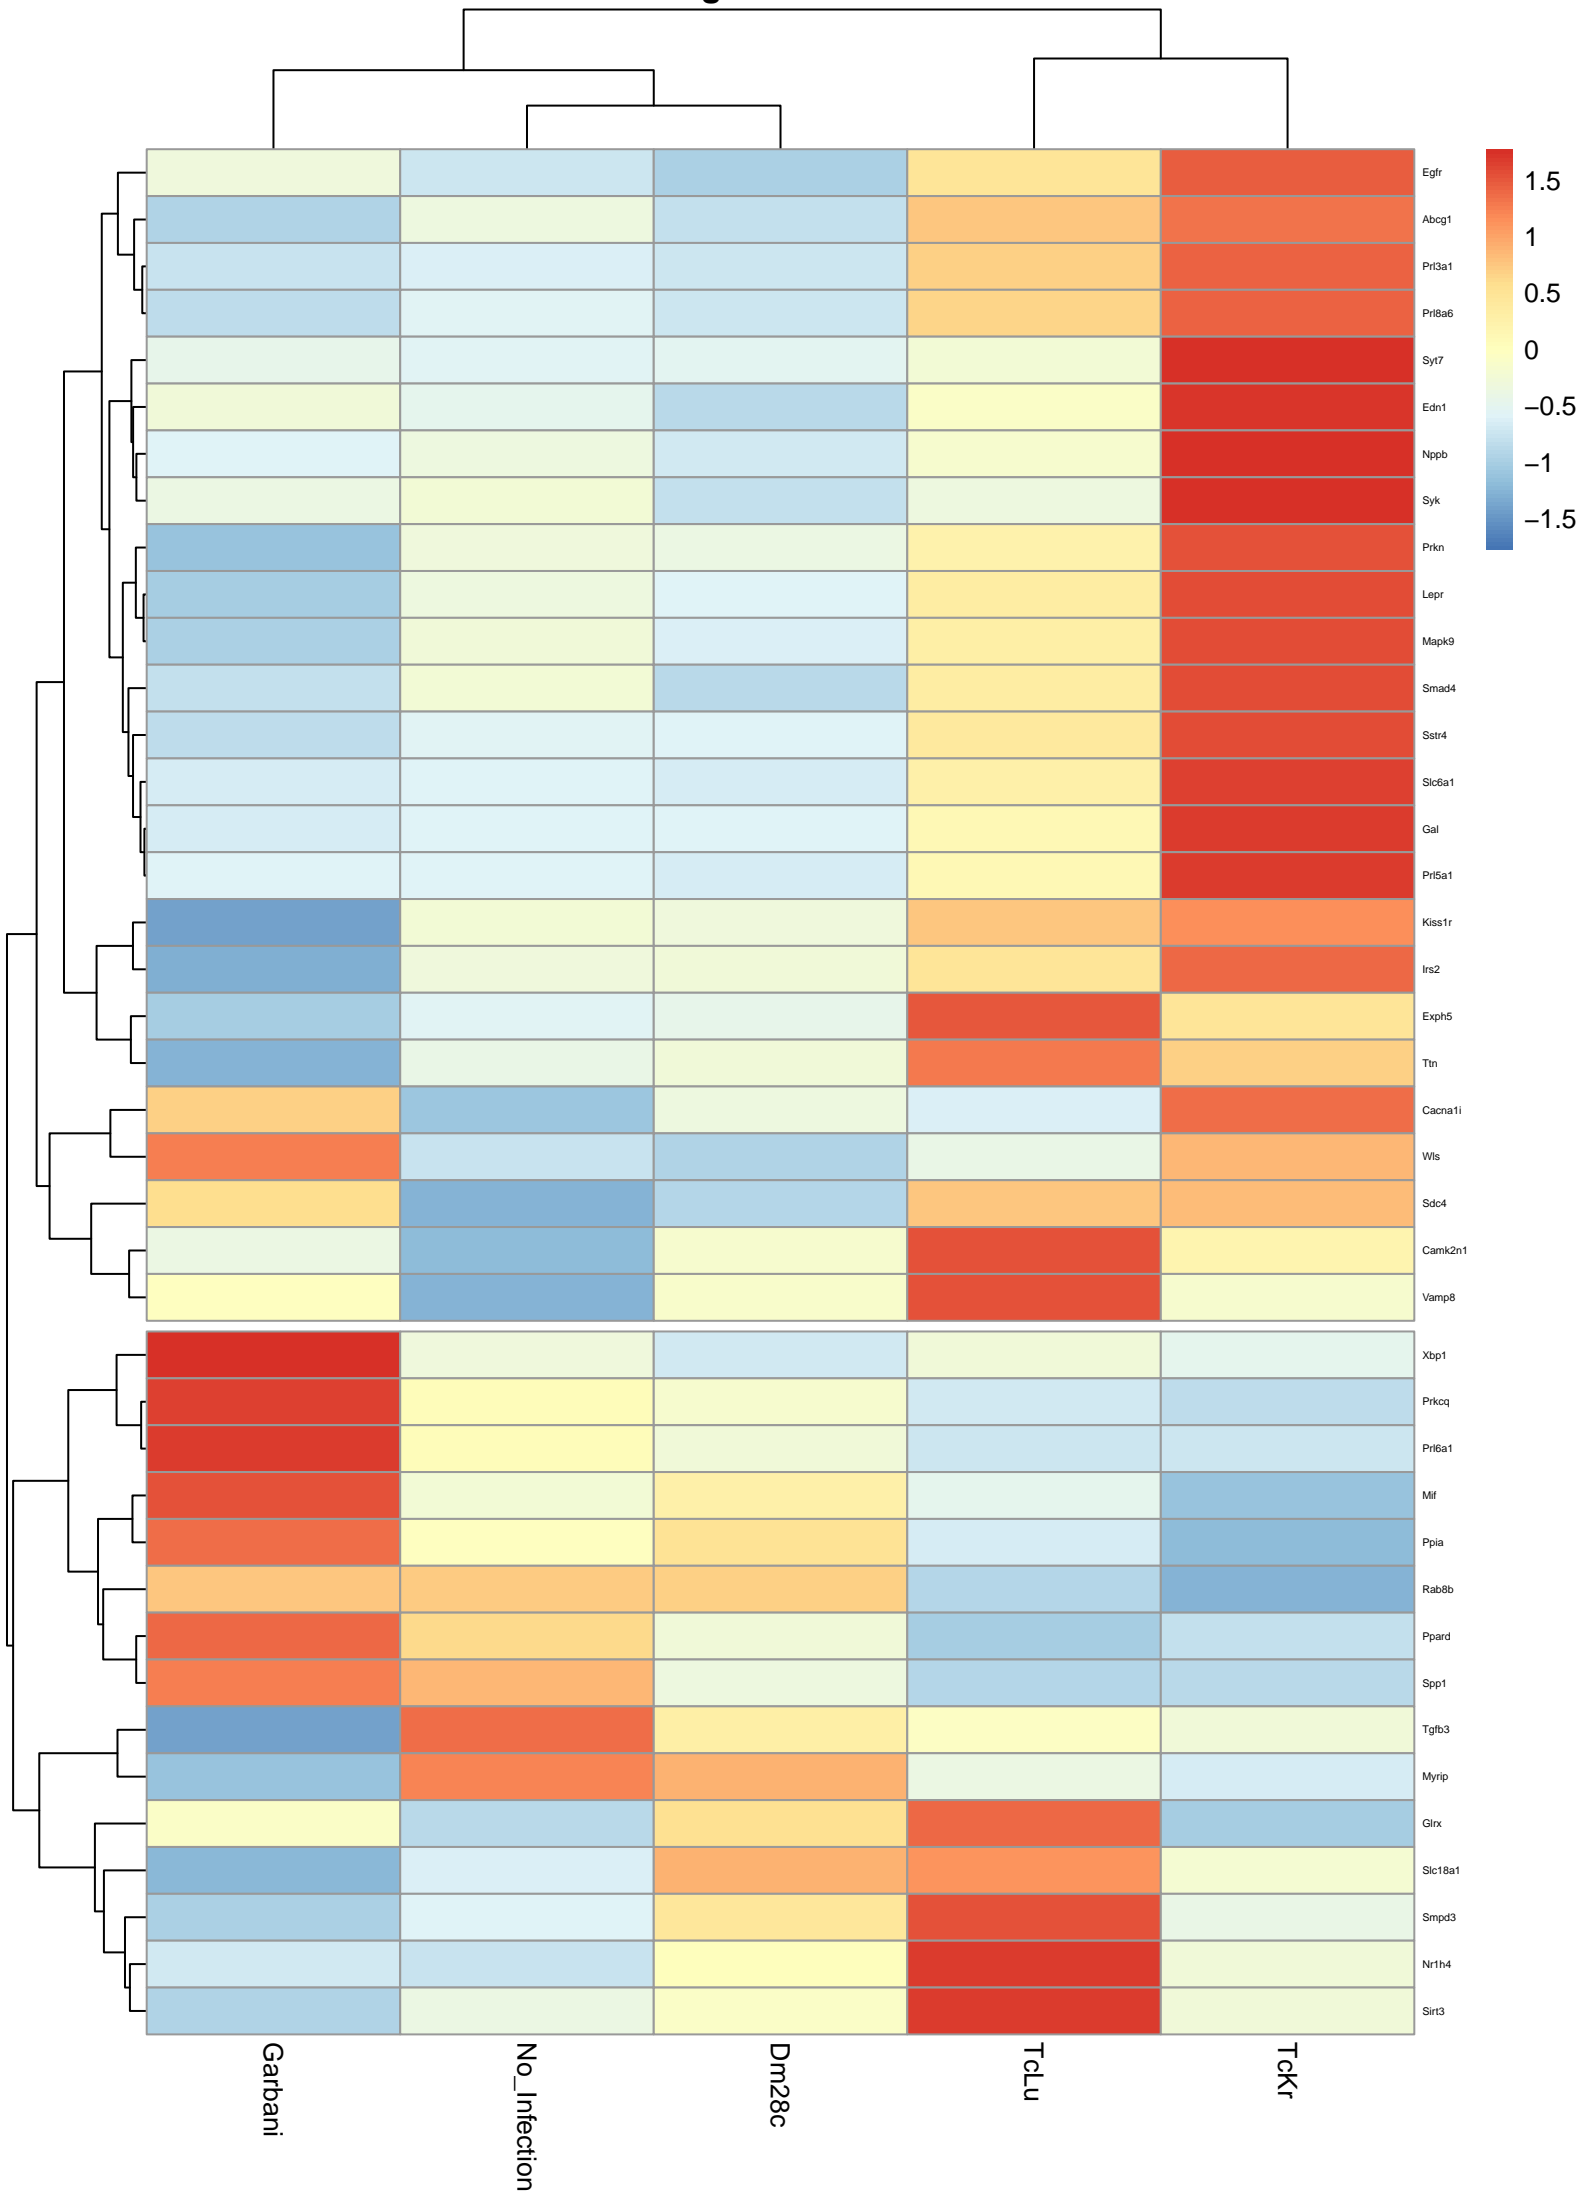

# Ribosomal Cytoplasmatic proteins

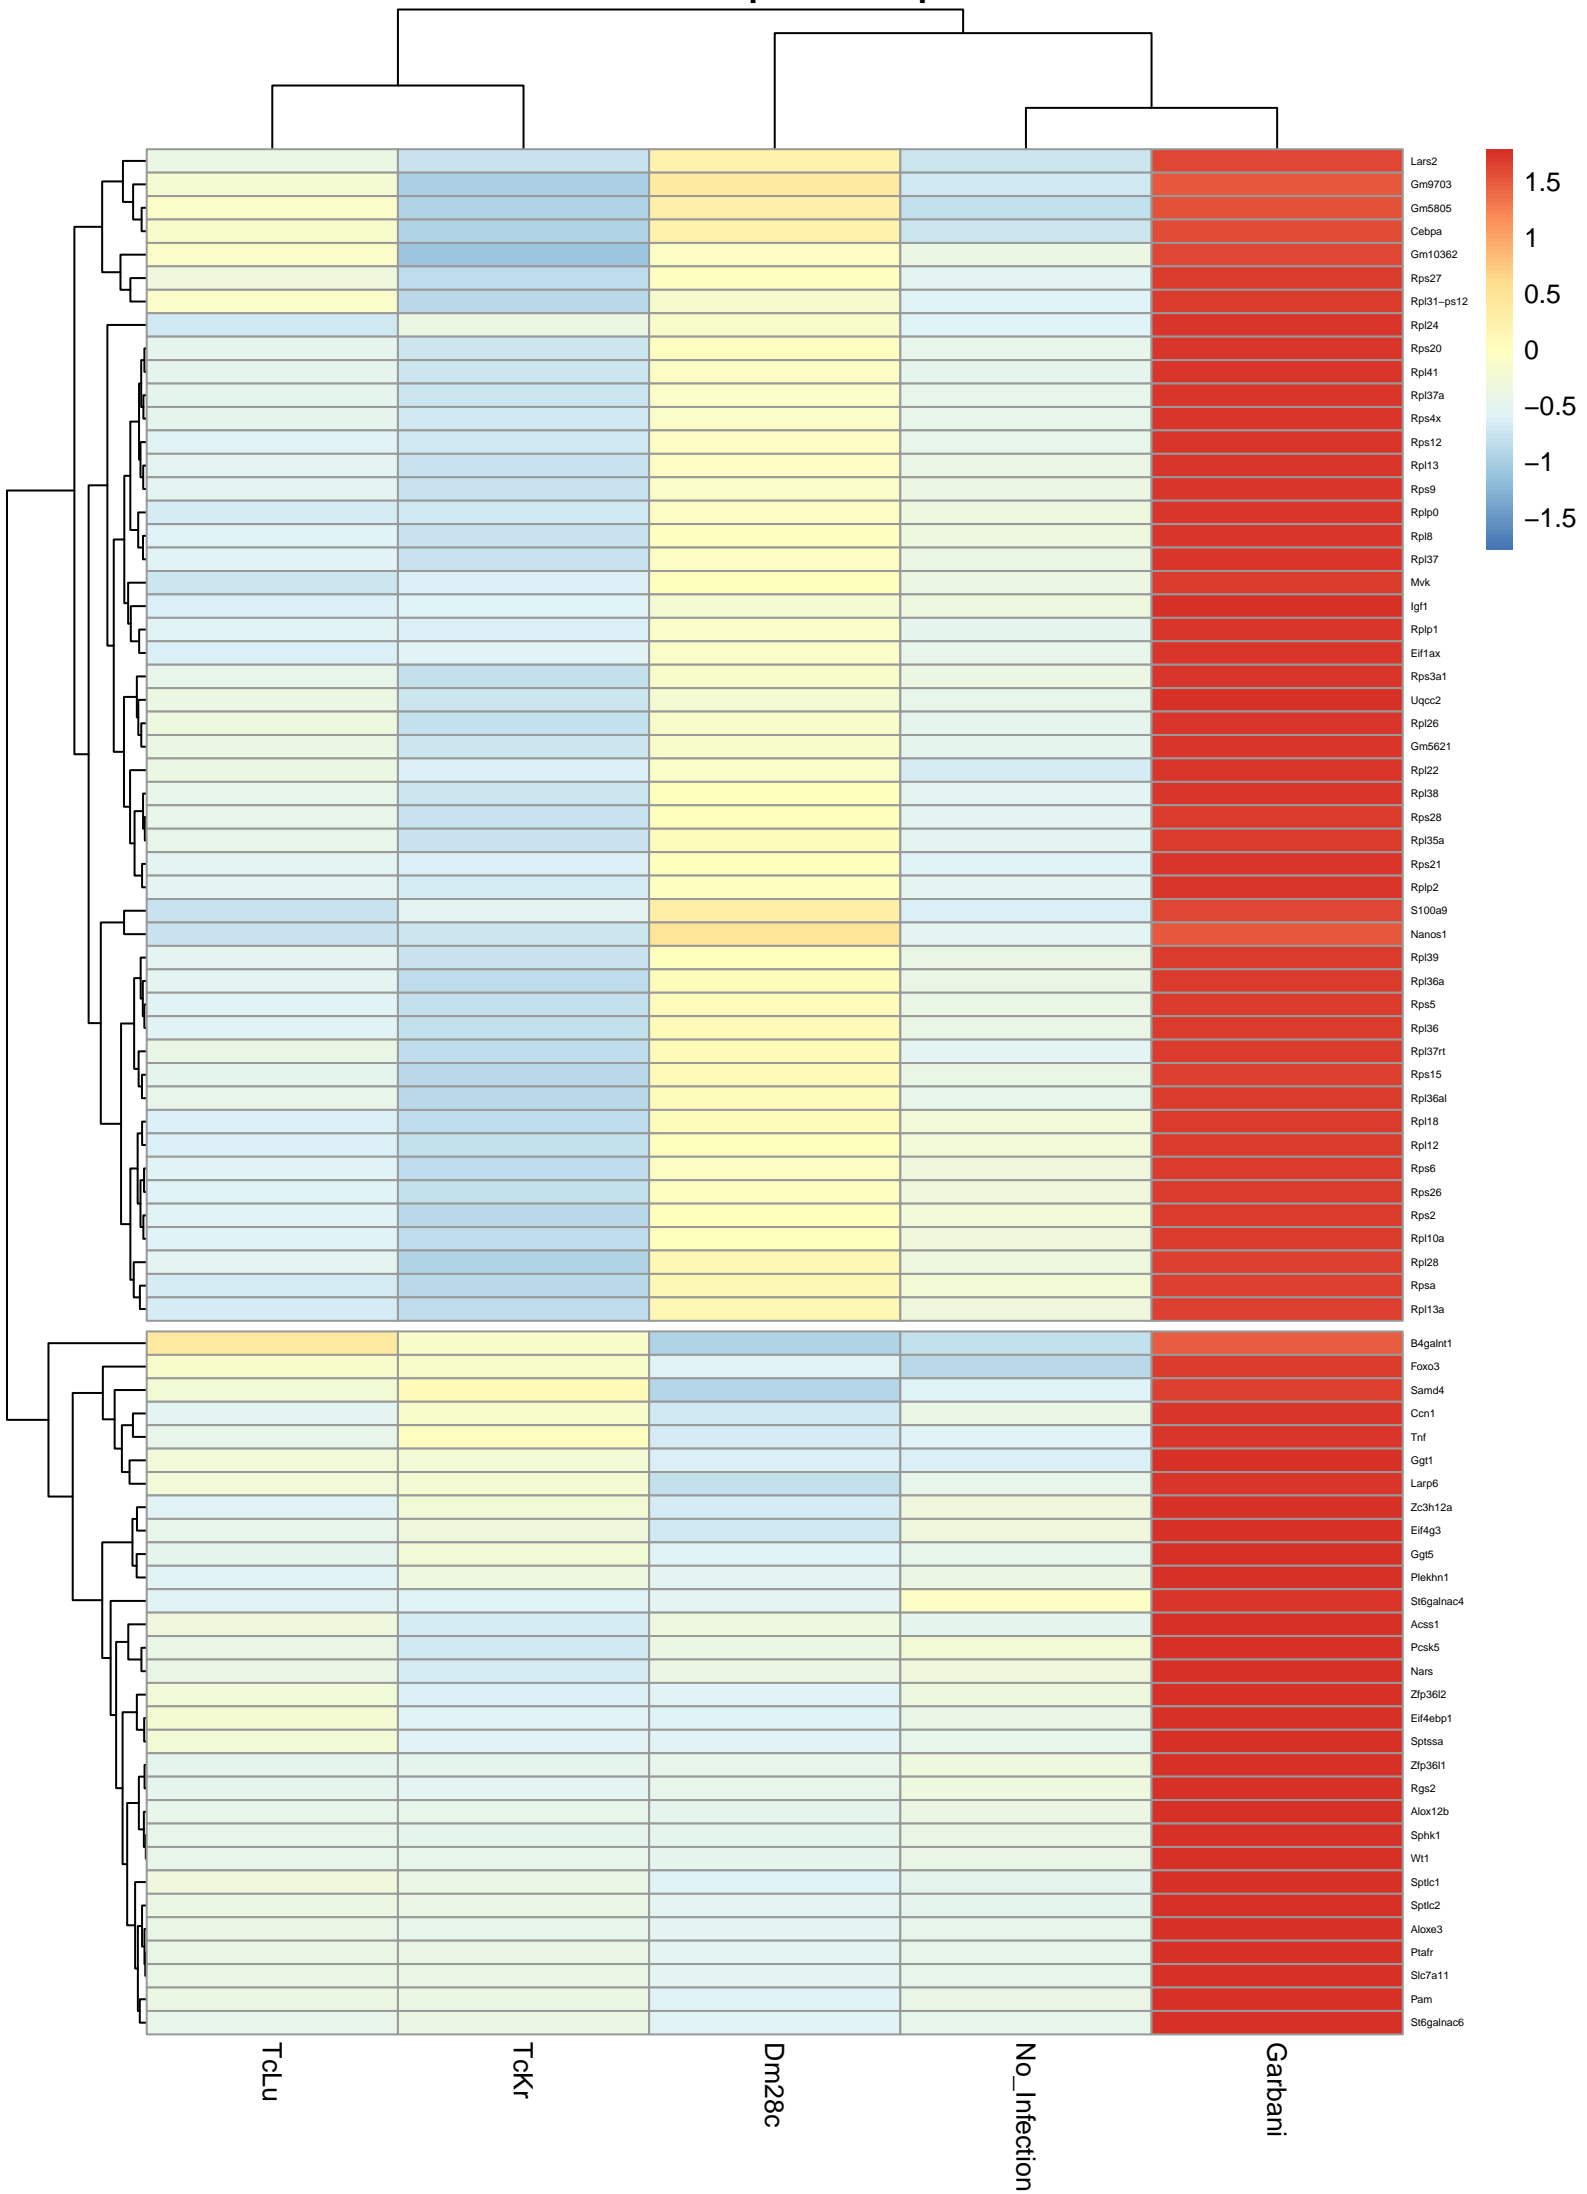

Supplement: spectrum.02504-22-s0001.pdf [file spectrum.02504-22-s0001.pdf]
